# Supplementary material for: Expression profiles of human endogenous retrovirus (HERV)-K and HERV-R Env proteins in various cancers
Source: PubMed Central journal article supplement — BMB Rep. 2021 Jul 31;54(7):368–73. doi: 10.5483/BMBRep.2021.54.7.246 (PMC8328825; doi:10.5483/bmbrep.2021.54.7.246), 2021-07-31
Supplement: bmb-54-7-368-supple.pdf [file bmb-54-7-368-supple.pdf]

**Manuscript Type:** Article

**Title:** Expression profiles of Human Endogenous Retrovirus (HERV)-K and HERV-R Env proteins in various cancers

**Author's name:** Eun-Ji Ko<sup>1,2\*\*</sup>, Kyoung Seob Song<sup>3\*\*</sup>, Mee Sun Ock<sup>1</sup>, Yung Hyun Choi<sup>4</sup>, SuhkMann Kim<sup>5</sup>, Heui-Soo Kim<sup>2</sup>, and Hee-Jae Cha<sup>1\*</sup>

**Affiliation:** <sup>1</sup>Department of Parasitology and Genetics, <sup>3</sup>Department of Physiology, Kosin University College of Medicine, Busan <sup>4</sup>Department of Biochemistry, College of Oriental Medicine, Dongeui University, Busan, <sup>2</sup>Department of Biological Sciences, <sup>5</sup>Department of Chemistry, College of Natural Sciences, Pusan National University, Busan, Republic of Korea

**Running Title:** Expression patterns of HERV-K and R Env proteins

**Keywords:** HERV, Env, cancer, expression pattern

**Corresponding Author's Information:**

\* Correspondence: hcha@kosin.ac.kr; Tel.: 82-51-990-6428.

\*\* These authors contributed equally to this work.

**A**

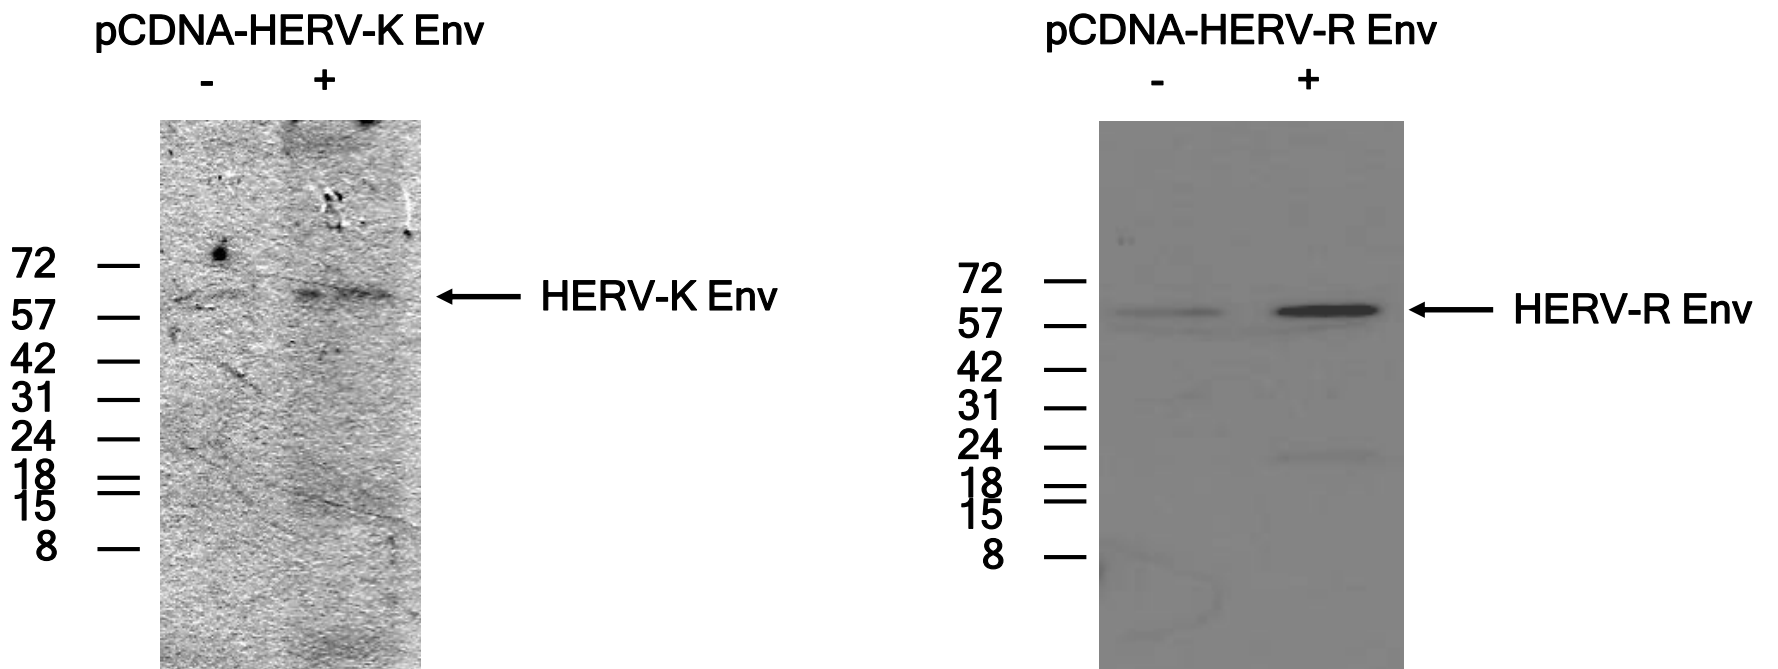

**B**

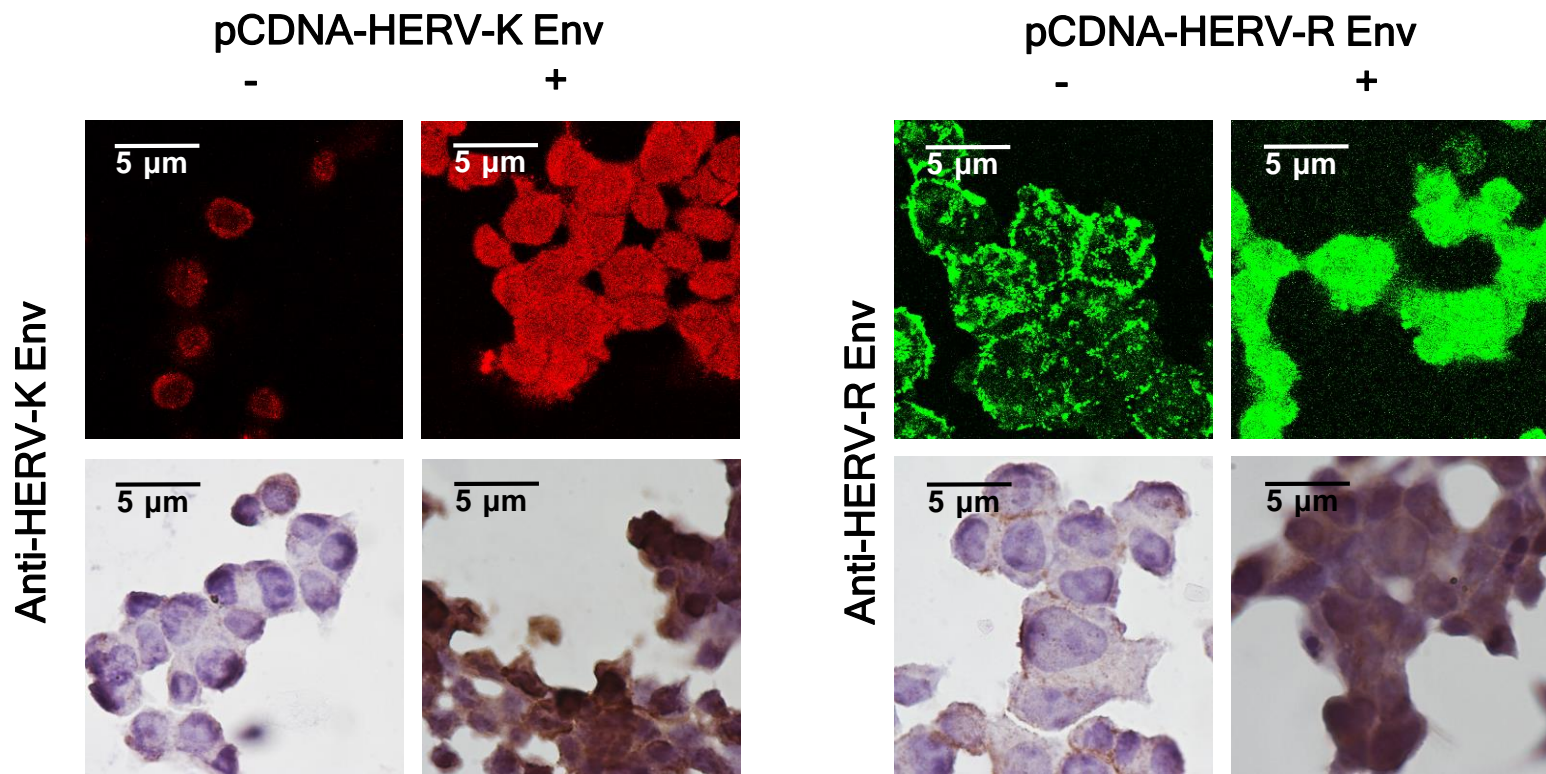

**C**

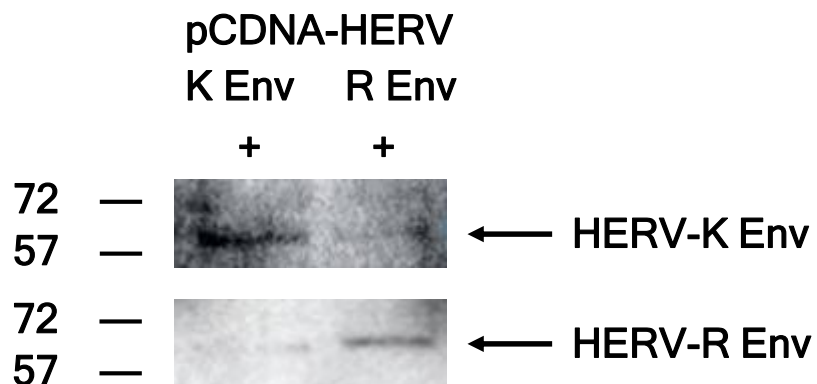

**D**

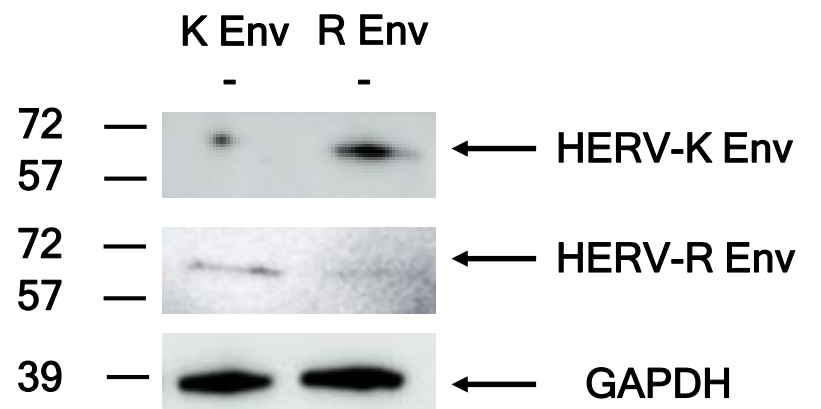

**Supplement-Figure. 1 Antibody specificity.** Antibody specificity of both anti HERV-K and HERV-R Env antibodies was confirmed by transfection of expression vectors of HERV-K or HERV-R *env* gene.

(A) Western blot analysis of HERV-K and HERV-R Env over-expression in control and transfected cells.

(B) Immunofluorescence and histochemical staining of HERV-K and HERV-R Env over-expression in control and transfected cells.

(C) Cross-reactivity check of both antibodies by Western blot analysis of proteins of HERV-K and HERV-R over-expressing cells.

(D) Cross-reactivity check of both antibodies by Western blot analysis of proteins of HERV-K and HERV-R Knockout cells.

A

## Breast Cancer

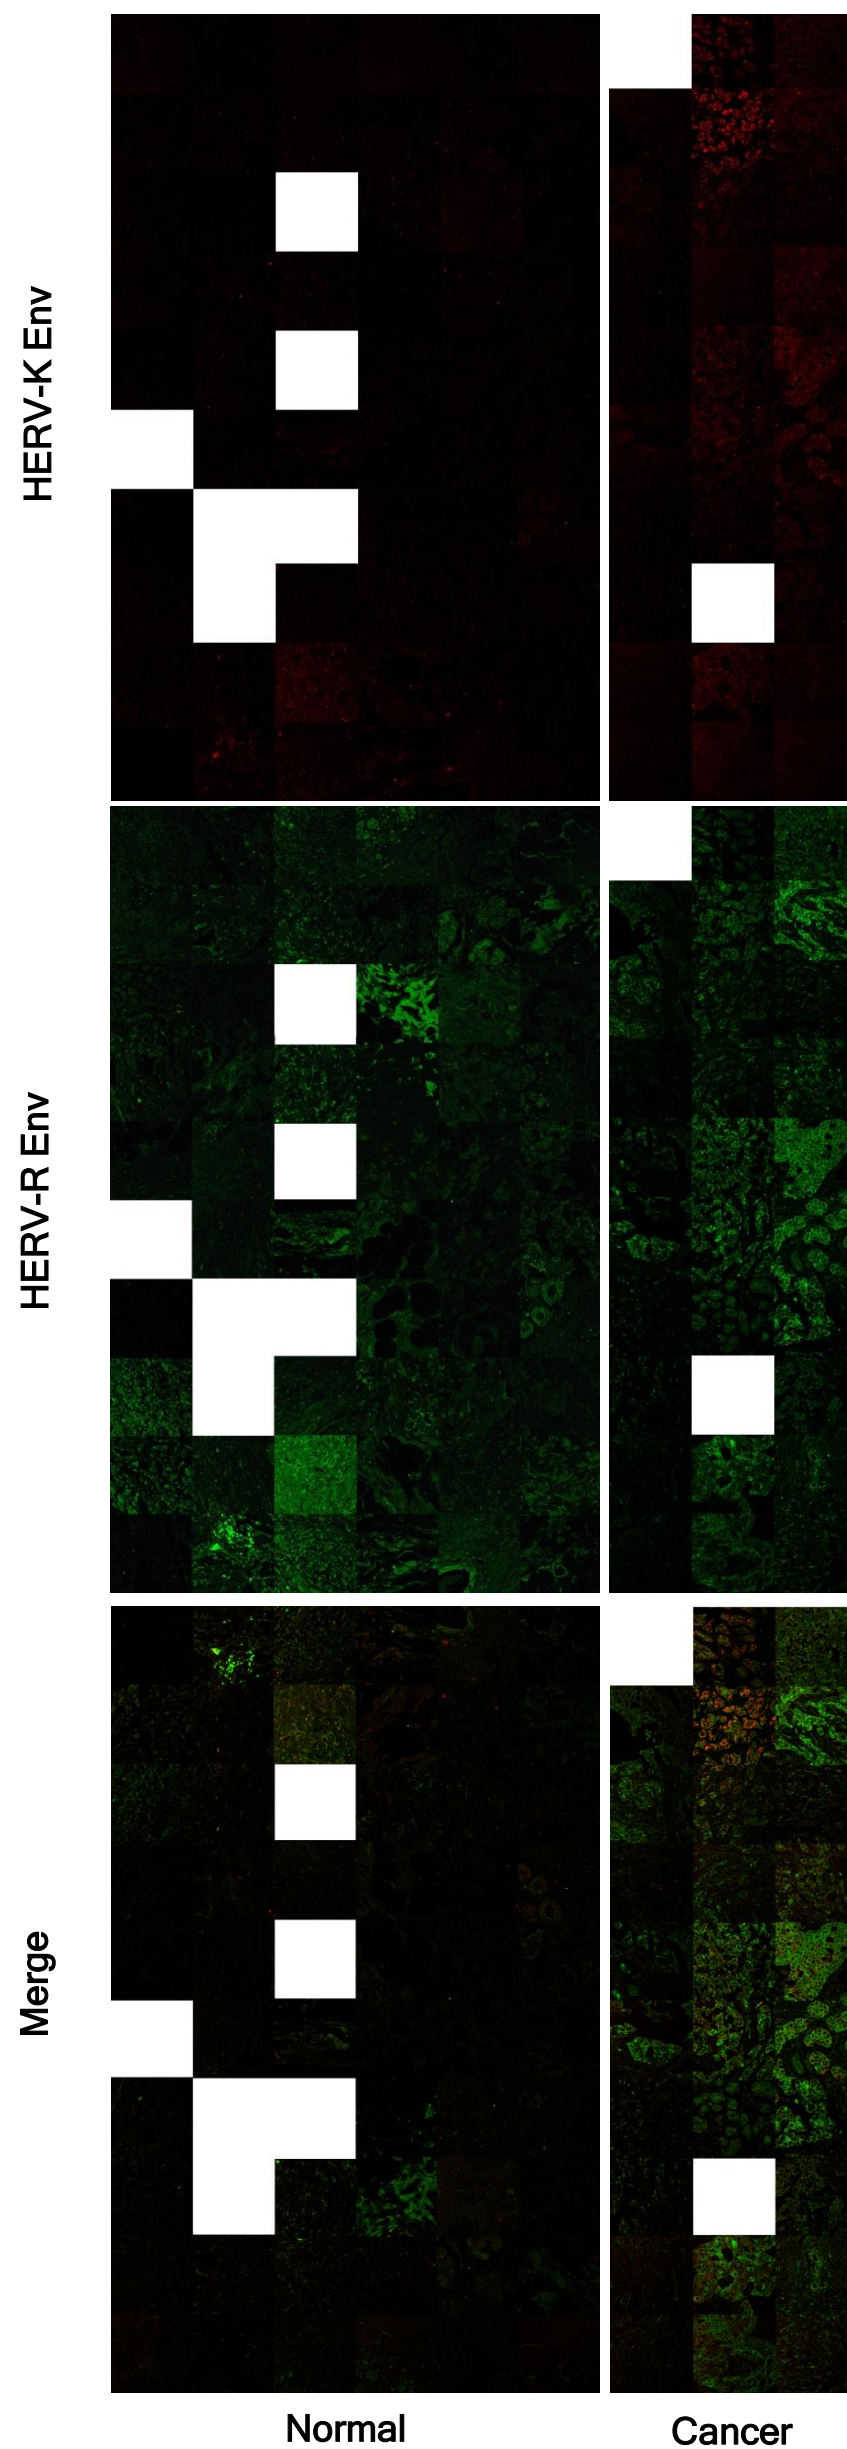

Supplement-Figure. 2 The expression of HERV-K and HERV-R Env proteins in various cancers. HERV-K and HERV-R Env protein expression was analyzed by immunofluorescence analysis with tissue microarray slides of breast cancer (A), melanoma (B), liver cancer (C), stomach cancer (D), ovarian cancer (E), kidney cancer (F), prostate cancer (G), cervical cancer (H), esophagus cancer (I), osteosarcoma (J), and colon cancer (K). The empty space is when the tissue is in poor condition and it is difficult to achieve adequate results.



**B****Melanoma**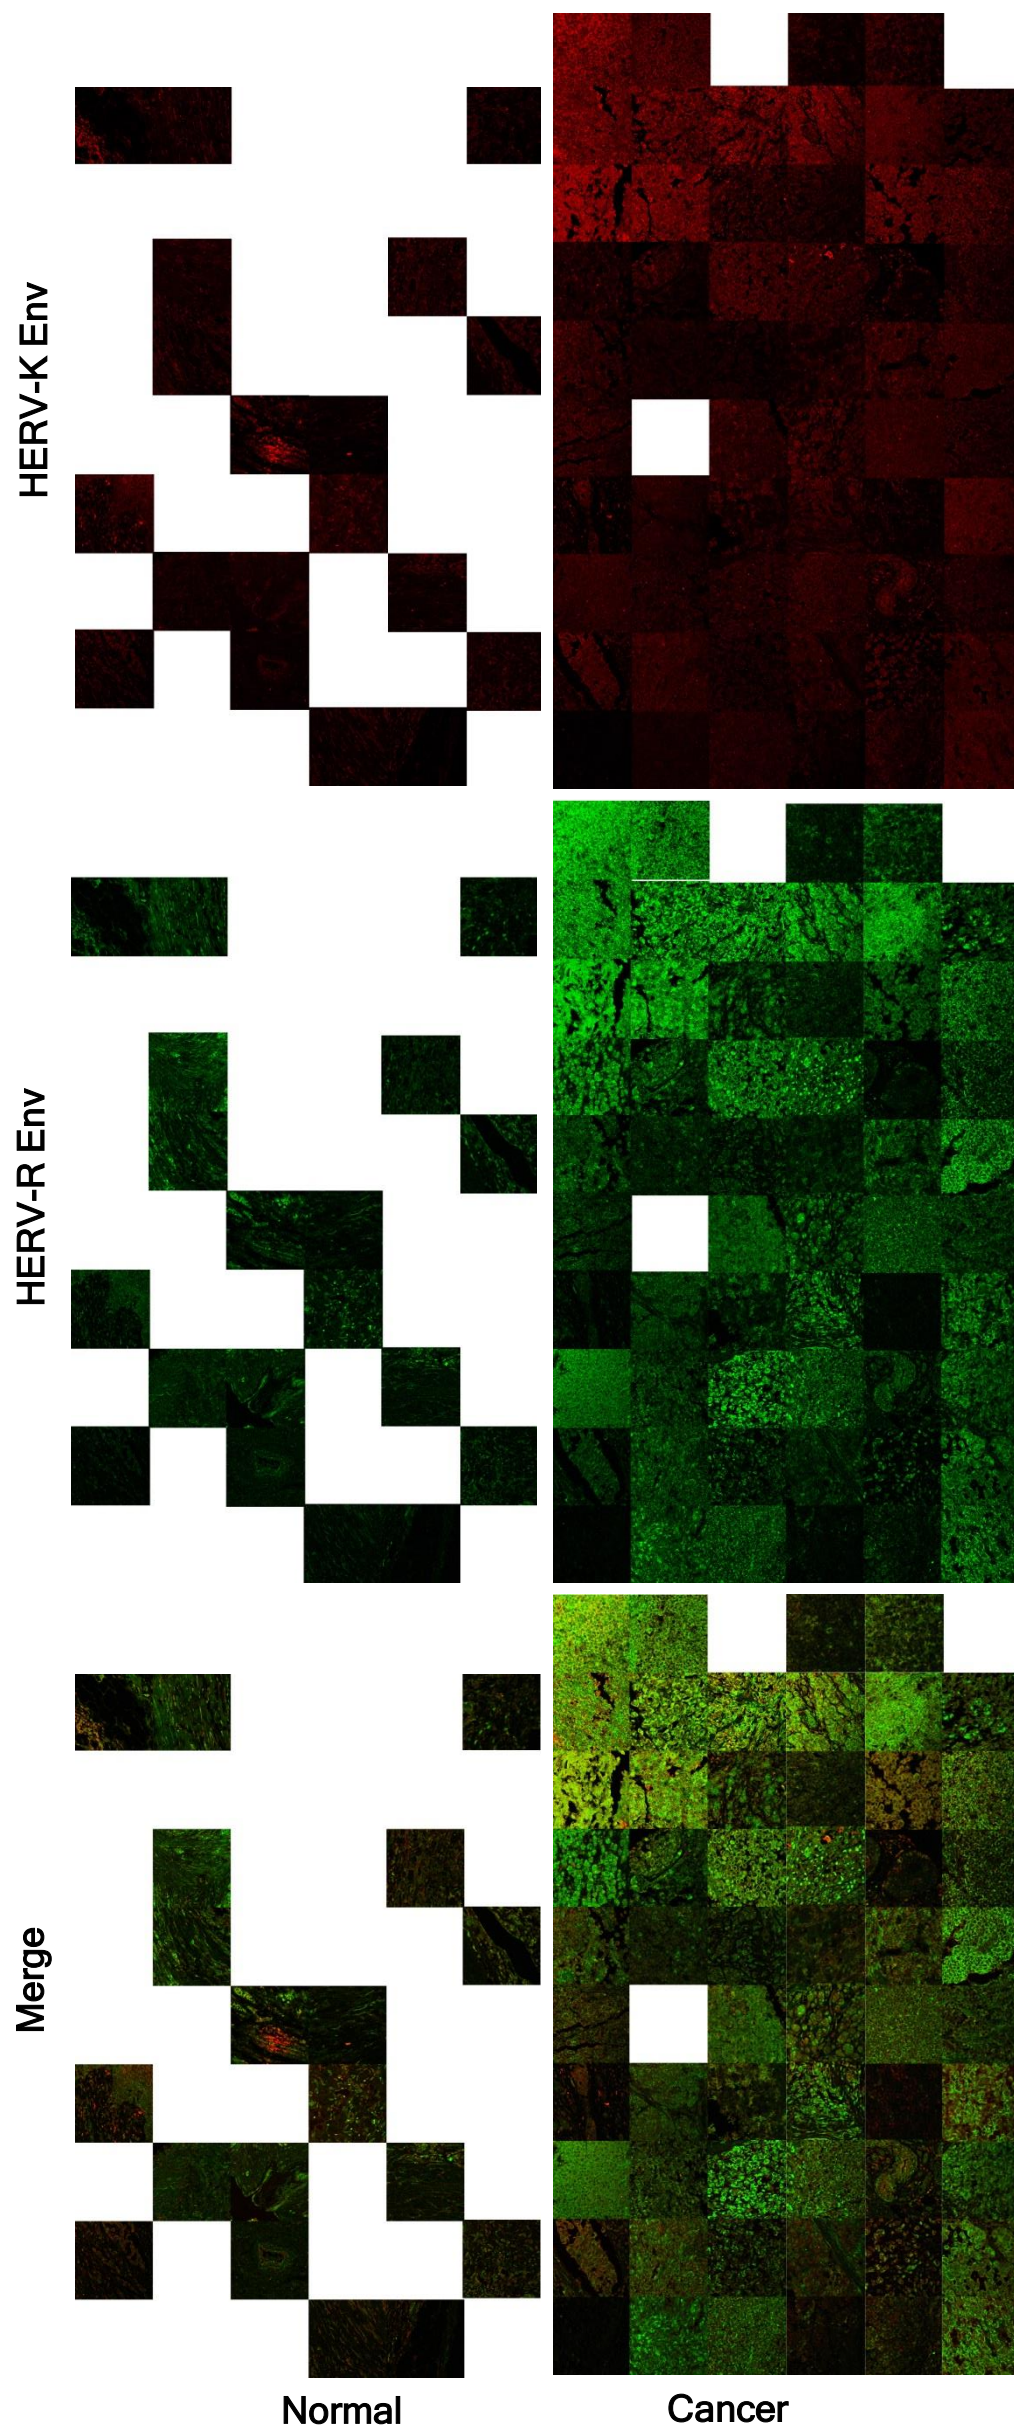



Liver Cancer

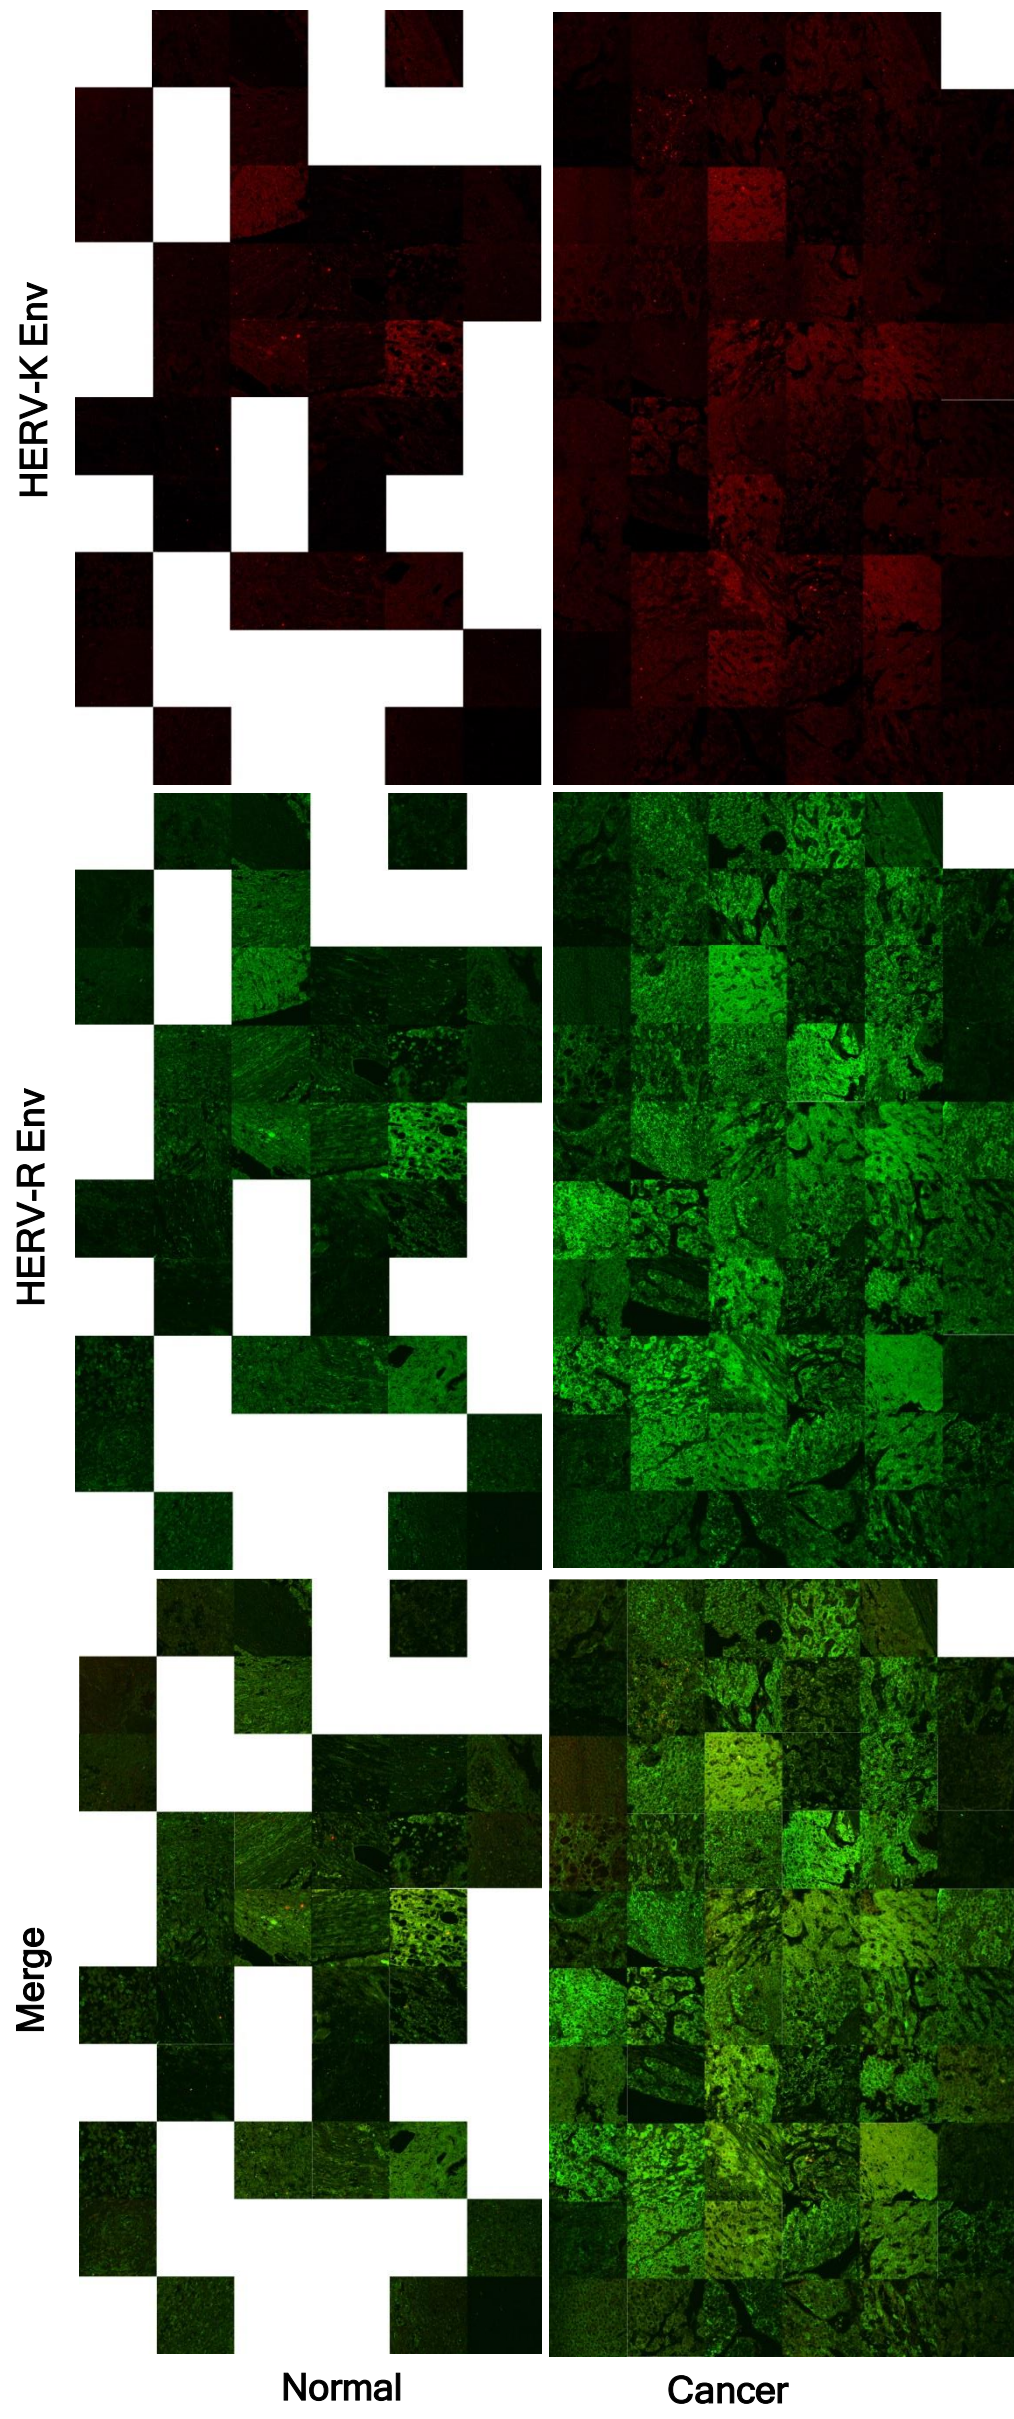



D

Stomach Cancer

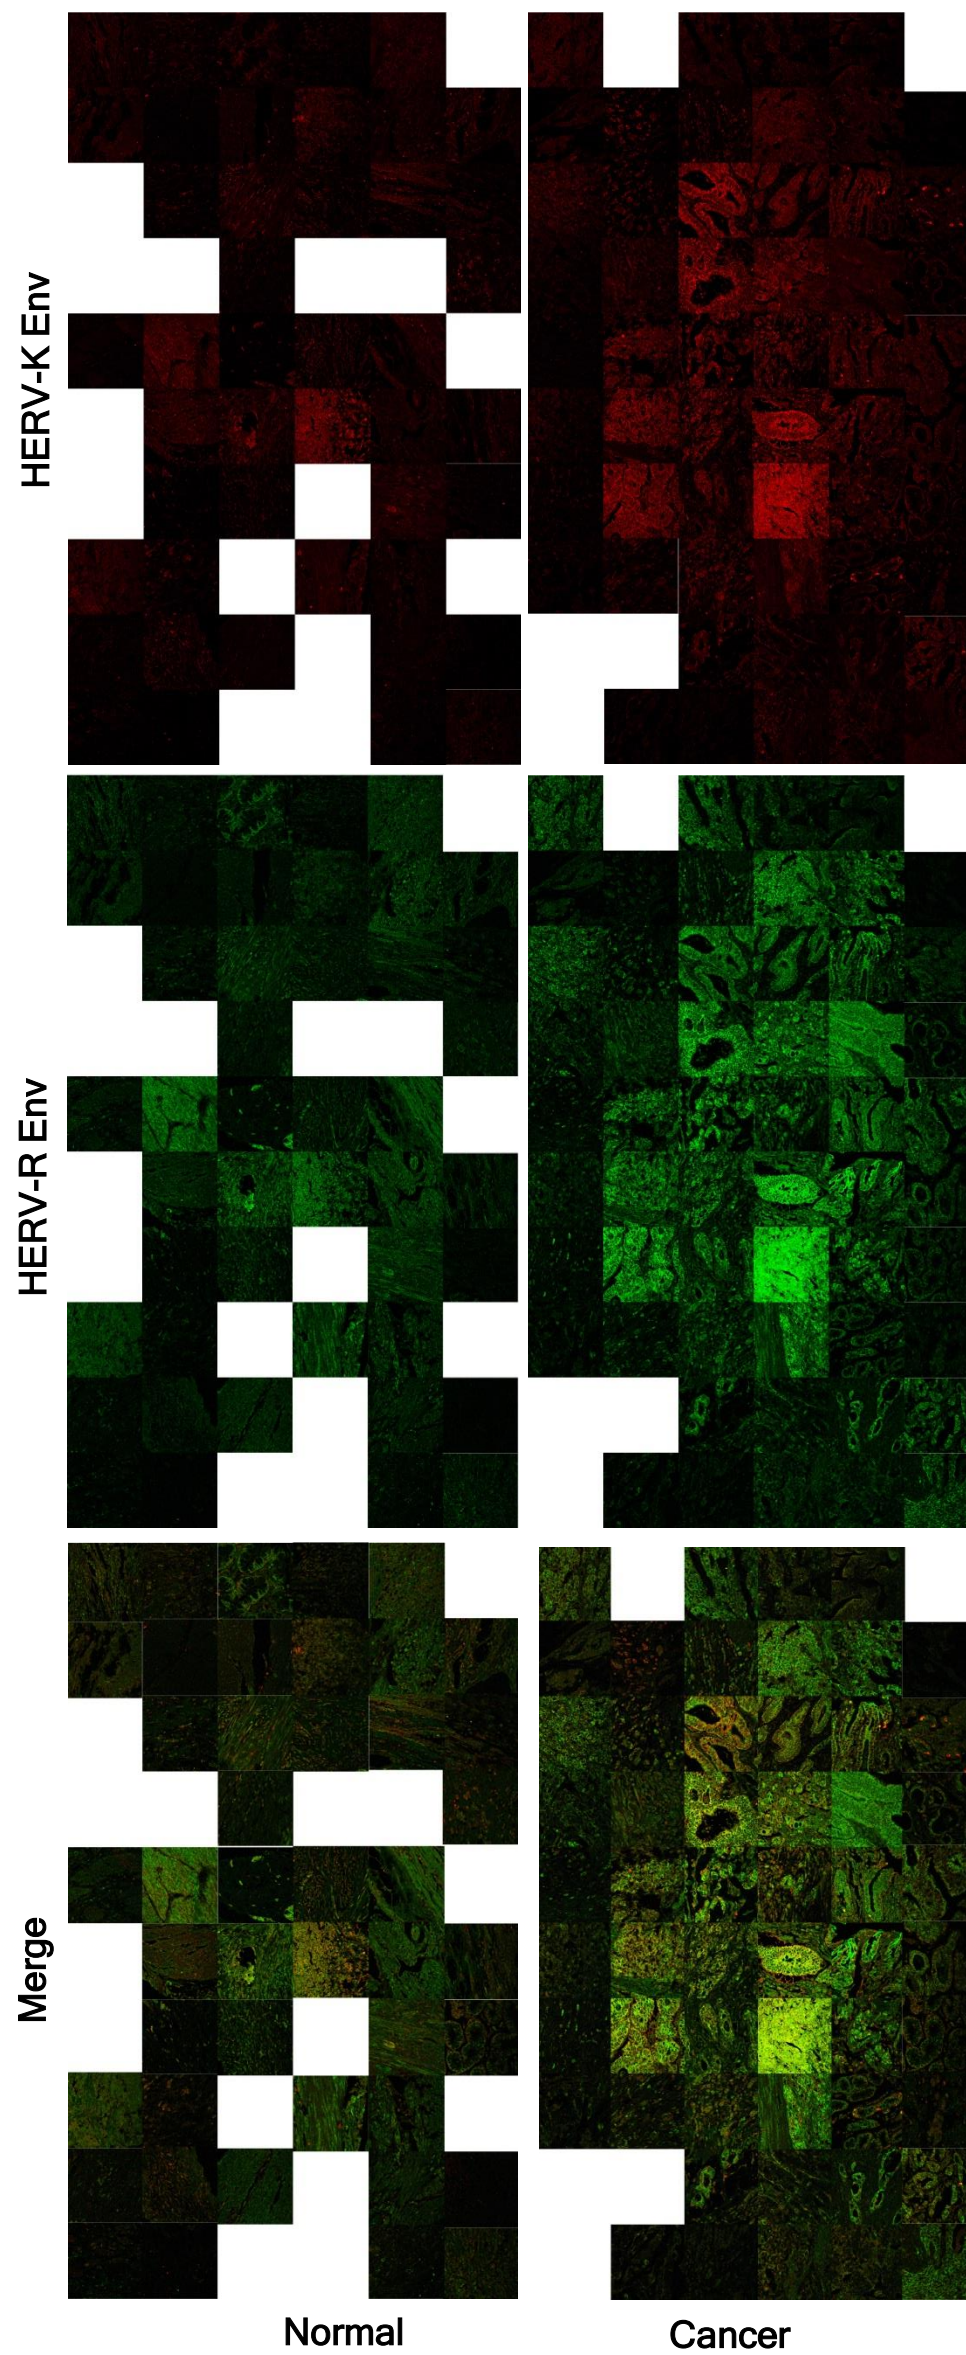



## Ovarian Cancer

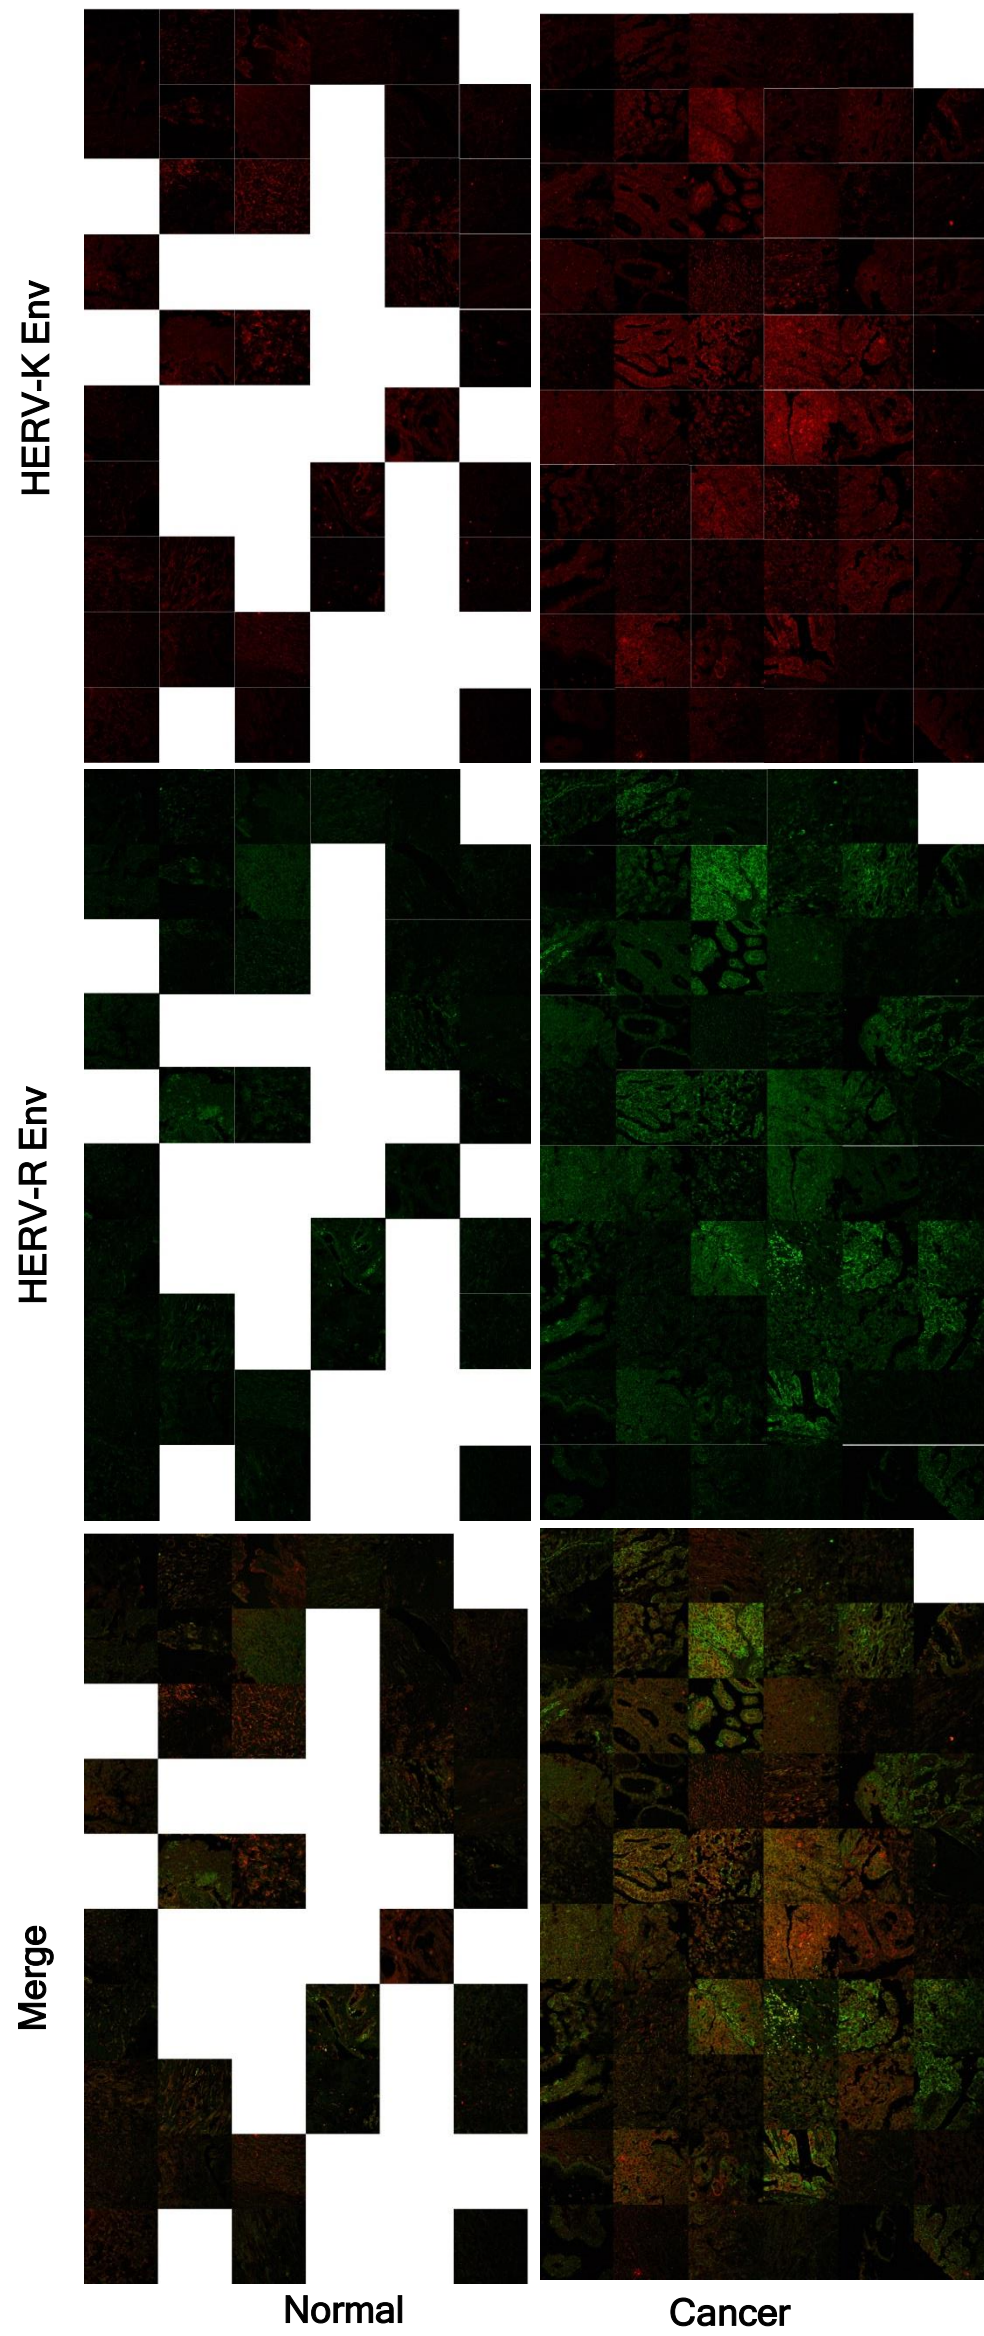



F

Kidney Cancer

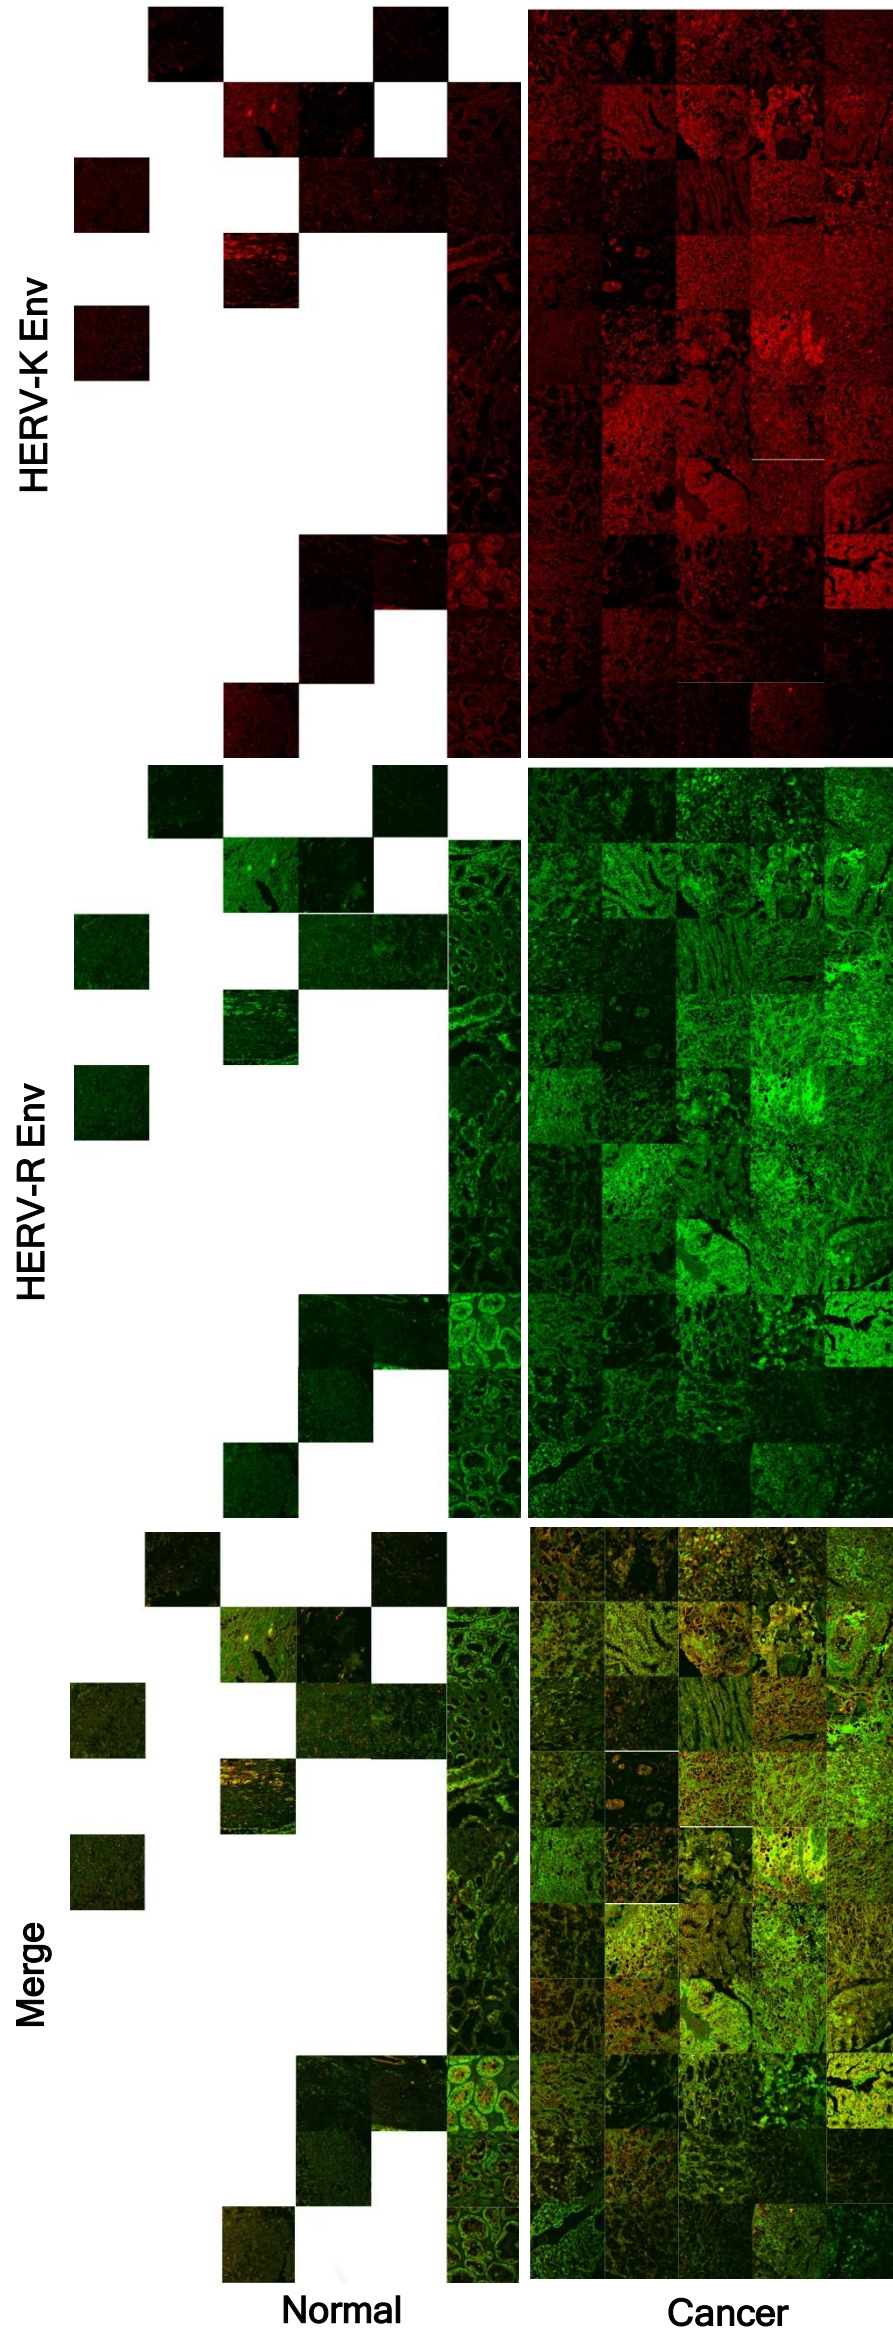



## Prostate Cancer

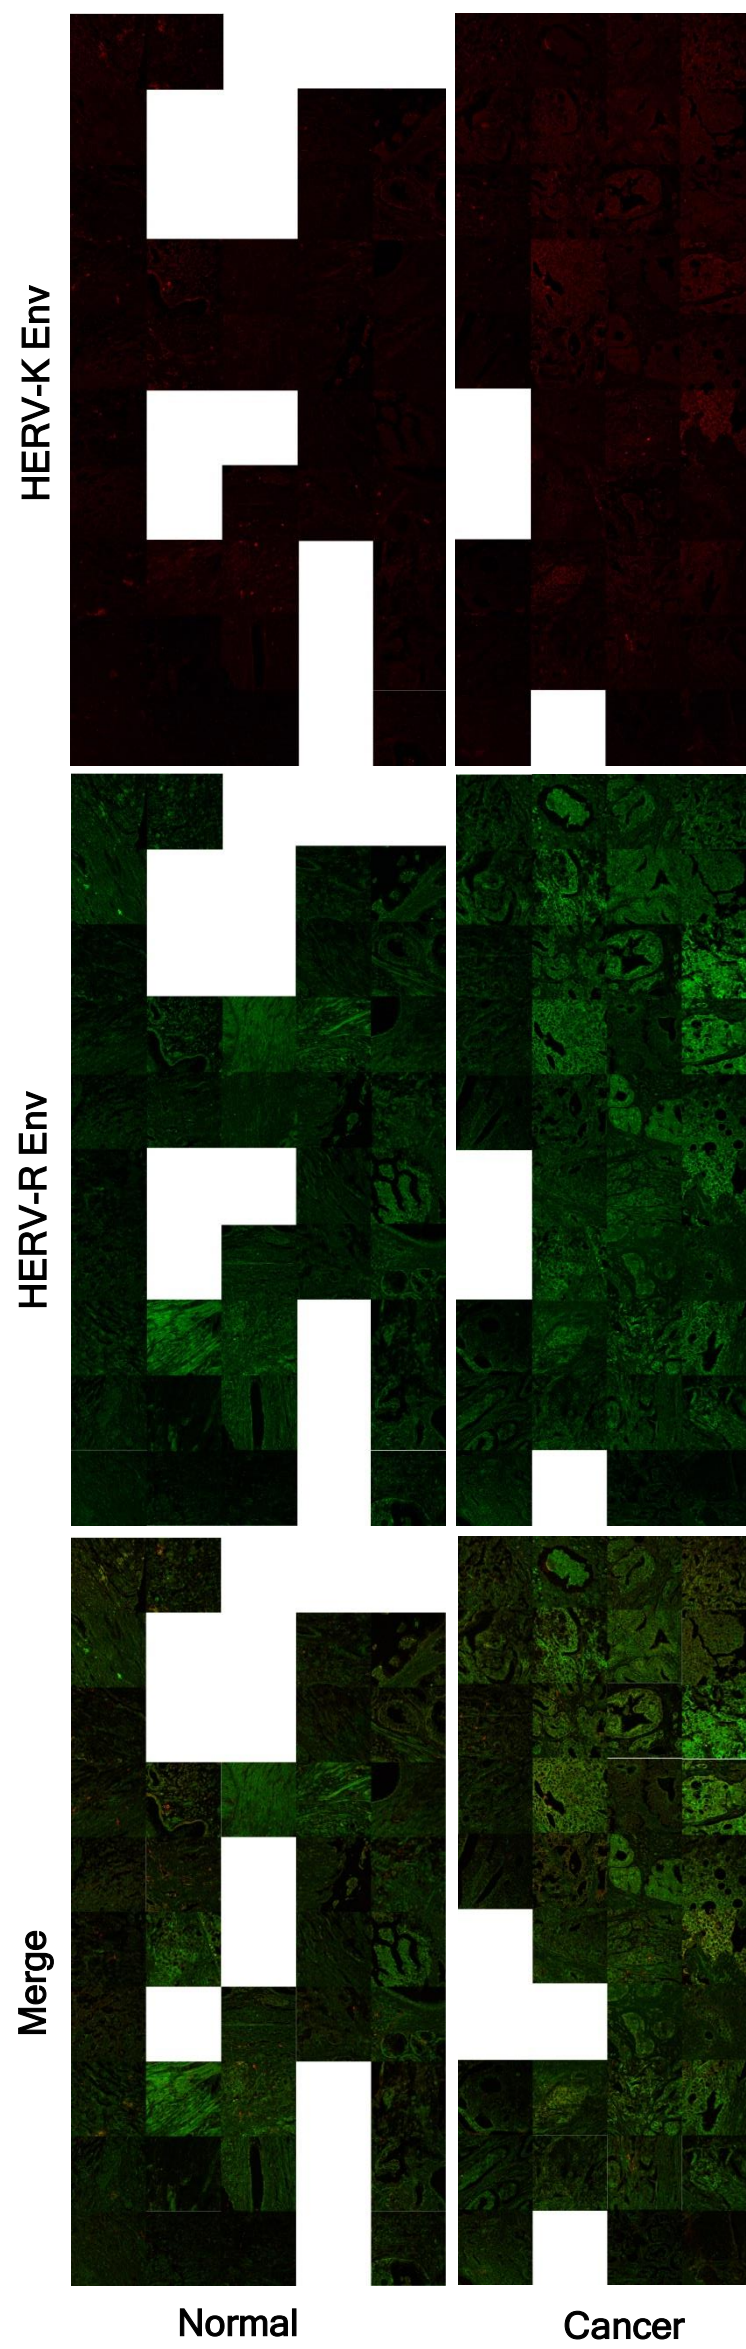



## Cervical Cancer

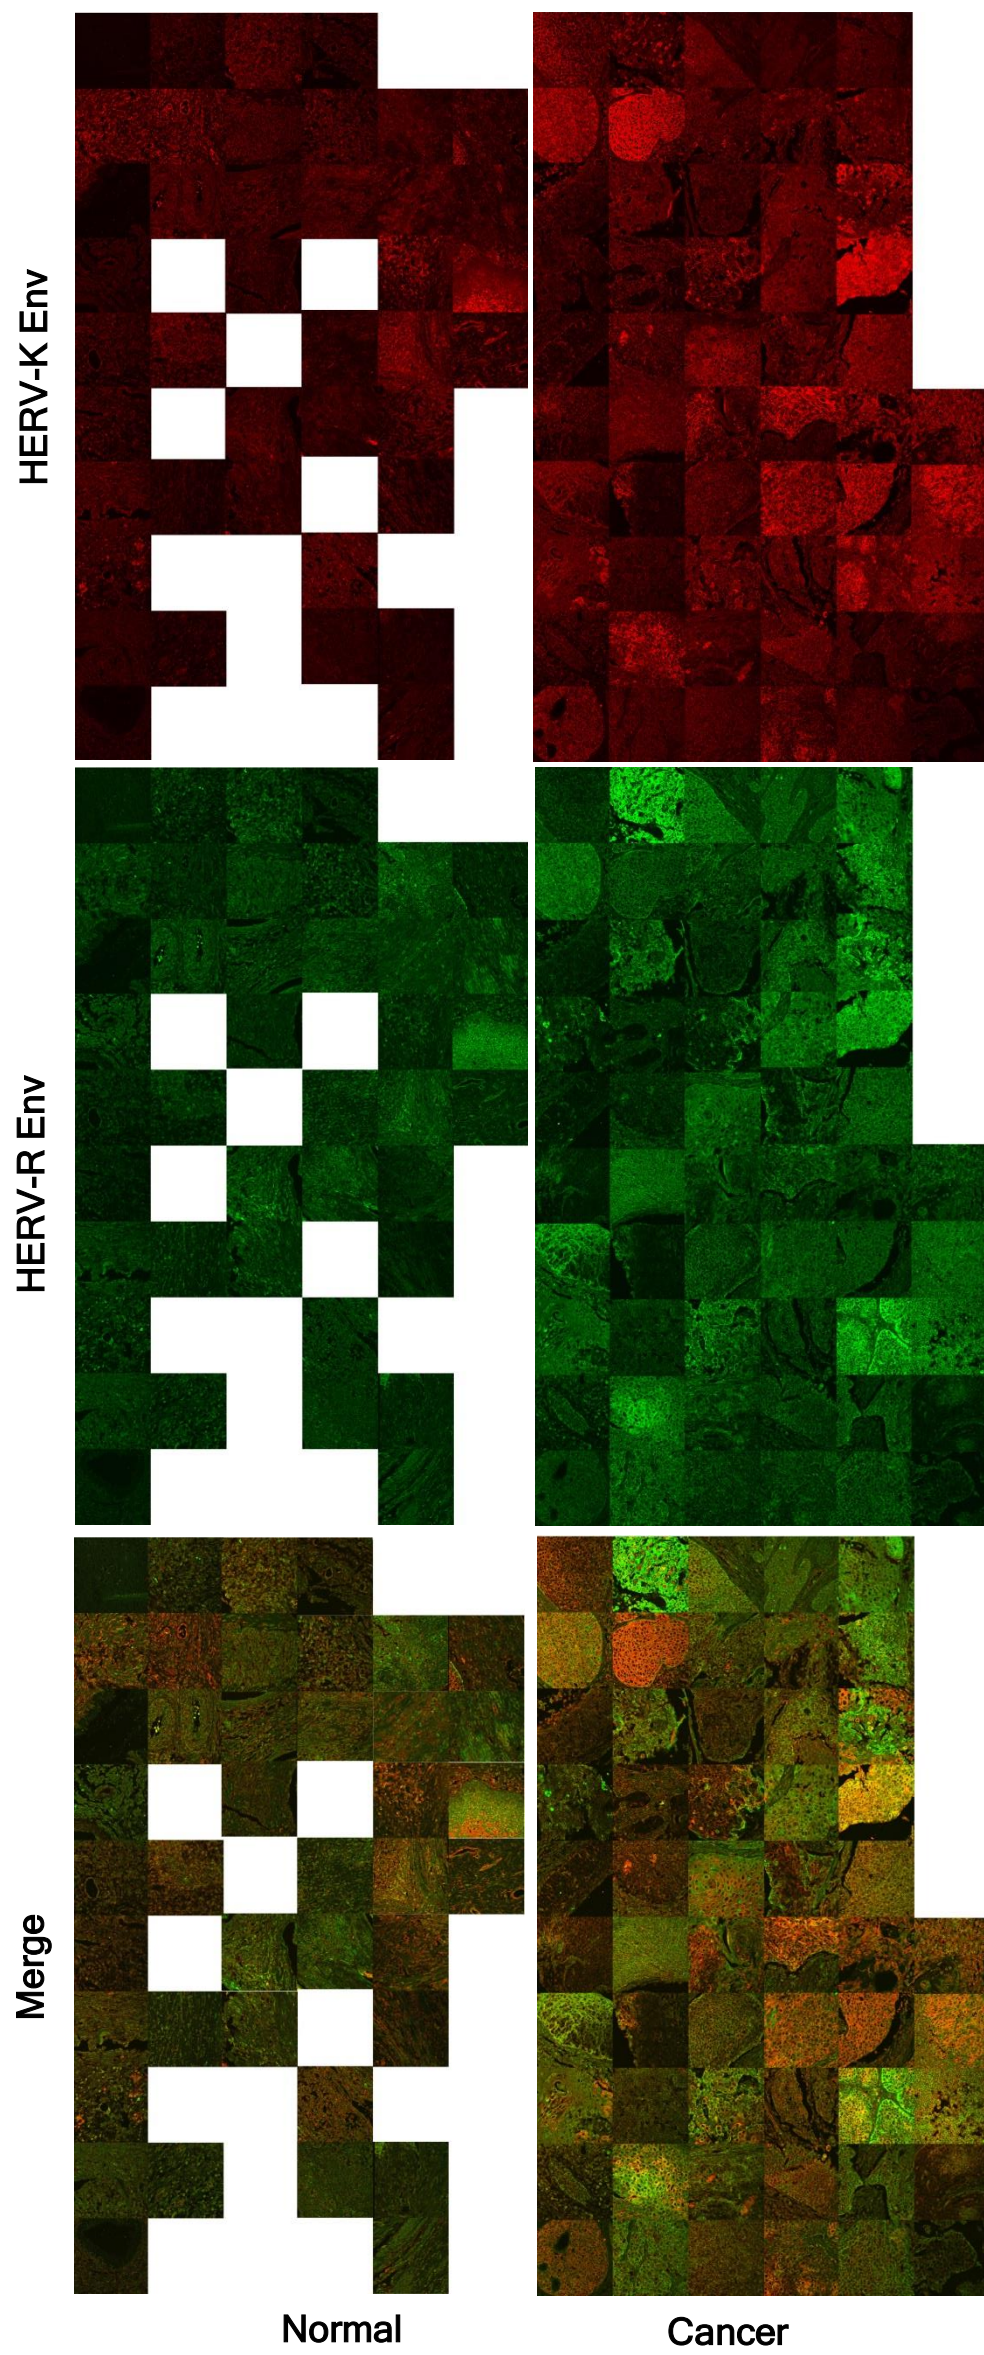



# Esophagus Cancer

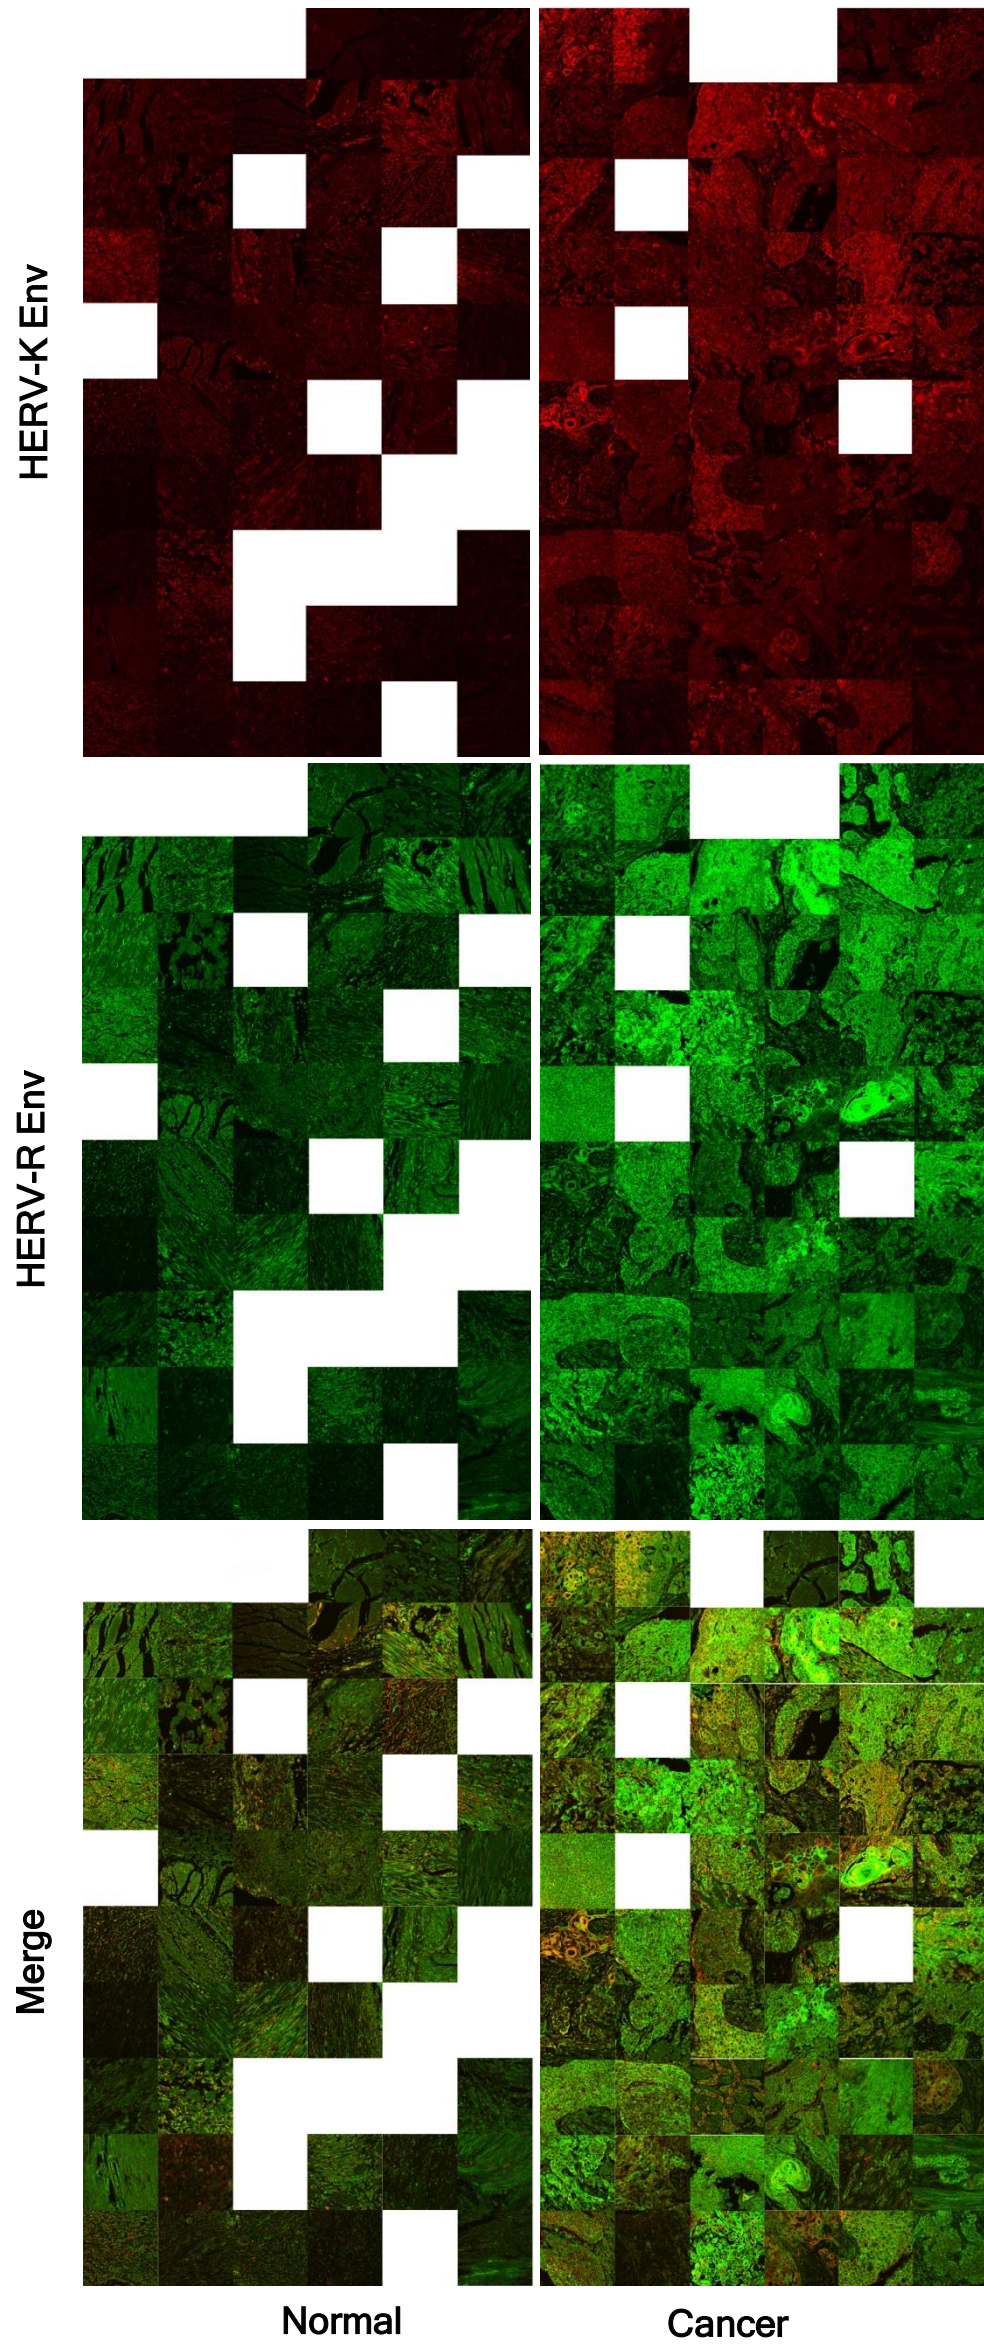

Osteosarcoma

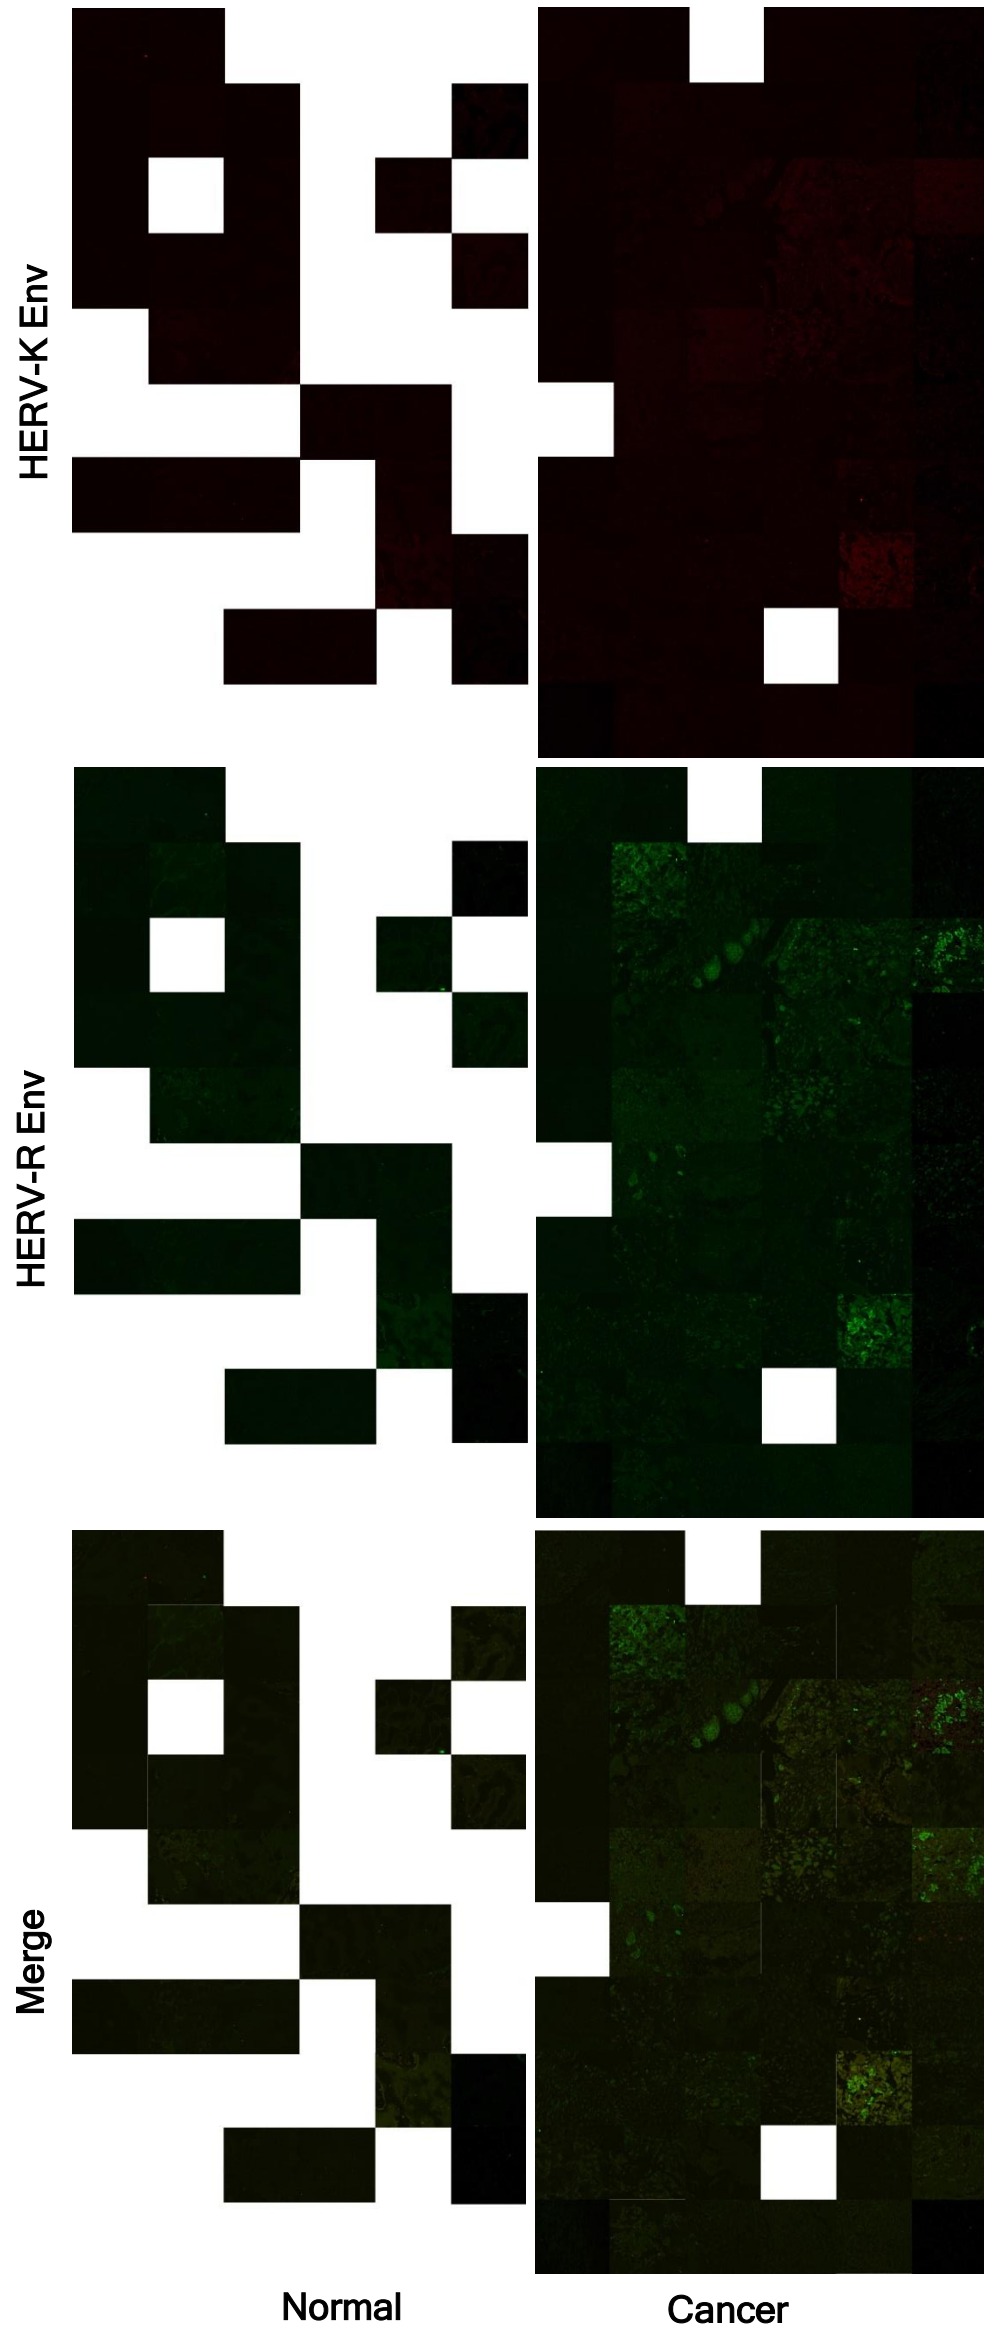

Normal

Cancer

HERV-K Env

HERV-R Env

Merge



K

Colon Cancer

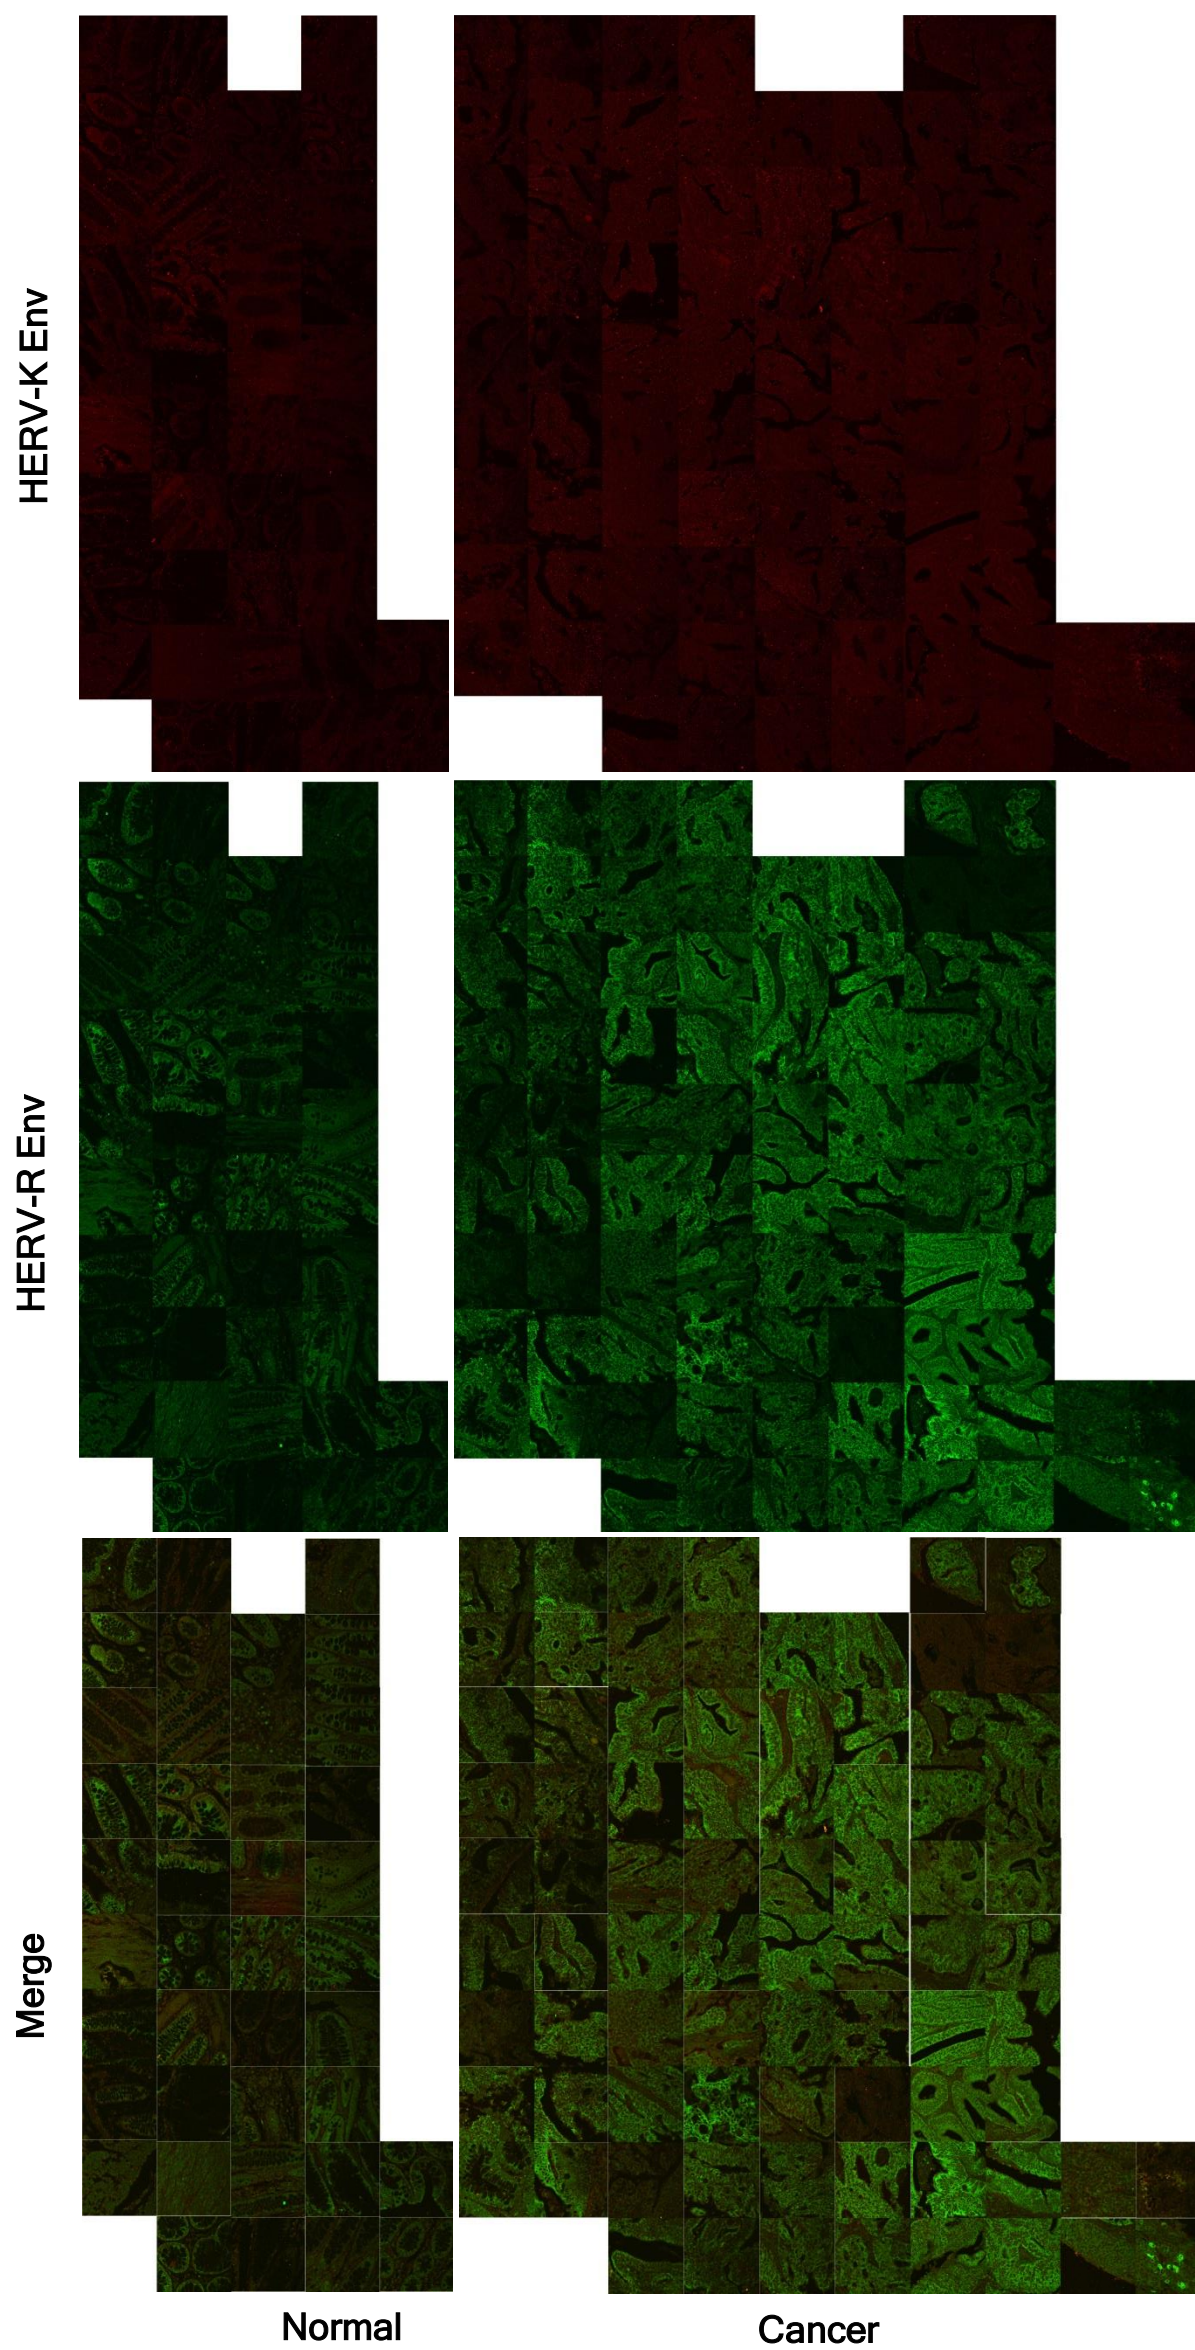

# Patients information of Breast cancer-metastasis-normal tissue microarray

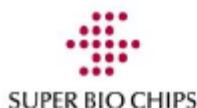

118-88 Yongdu-dong, Seoul 130-820, Korea  
 Tel +82 2 3676 8270 Fax +82 2 3676 8269  
 www.tissue-array.com info@tissue-array.com

## CBA4 Human, Breast cancer-metastasis-normal

| No. | Age | Sex | Organ      | Diagnosis                       | pTNM     | Stage | LN*   | Tissue type ** |
|-----|-----|-----|------------|---------------------------------|----------|-------|-------|----------------|
| 1   | 59  | F   | Breast     | infiltrating duct carcinoma     | T2N0M0   | II A  | 0/19  | 6              |
| 2   | 48  | F   | Breast     | infiltrating duct carcinoma     | T2N0M0   | II A  | 0/16  | 6              |
| 3   | 42  | F   | Breast     | infiltrating duct carcinoma     | T2N2aM0  | III A | 5/19  | 6              |
| 4   | 37  | F   | Breast     | infiltrating duct carcinoma     | T2N2aM0  | III A | 8/8   | 6              |
| 5   | 37  | F   | Breast     | infiltrating duct carcinoma     | T2N0M0   | II A  | 0/20  | 6              |
| 6   | 55  | F   | Breast     | infiltrating duct carcinoma     | T2N0M0   | II A  | 0/19  | 6              |
| 7   | 55  | F   | Breast     | infiltrating duct carcinoma     | T3N3aM0  | III C | 20/20 | 6              |
| 8   | 36  | F   | Breast     | infiltrating duct carcinoma     | T3N0M0   | II B  | 0/14  | 6              |
| 9   | 52  | F   | Breast     | infiltrating duct carcinoma     | T2N2aM0  | III A | 5/24  | 6              |
| 10  | 40  | F   | Breast     | infiltrating duct carcinoma     | T2N0M0   | II A  | 0/11  | 6              |
| 11  | 51  | F   | Breast     | infiltrating duct carcinoma     | T2N0M0   | II A  | 0/8   | 6              |
| 12  | 55  | F   | Breast     | infiltrating duct carcinoma     | T2N0M0   | II A  | 0/19  | 6              |
| 13  | 60  | F   | Breast     | infiltrating duct carcinoma     | T2N0M0   | II A  | 0/16  | 6              |
| 14  | 45  | F   | Breast     | sarcomatoid carcinoma           | T2N1aM0  | II B  | 3/23  | 6              |
| 15  | 38  | F   | Breast     | infiltrating duct carcinoma     | T3N1aM0  | III A | 3/13  | 6              |
| 16  | 53  | F   | Breast     | infiltrating duct carcinoma     | T2N1mIM0 | II B  | 3/14  | 6              |
| 17  | 48  | F   | Breast     | infiltrating duct carcinoma     | T2N1mIM0 | II B  | 2/15  | 6              |
| 18  | 46  | F   | Breast     | intraductal papillary carcinoma | T2N0M0   | II A  | 0/15  | 6              |
| 19  | 40  | F   | Breast     | infiltrating duct carcinoma     | T3N0M0   | II B  | 0/10  | 6              |
| 20  | 51  | F   | Breast     | atypical medullary carcinoma    | T2N1aM0  | II B  | 1/16  | 6              |
| 21  | 56  | F   | Breast     | infiltrating duct carcinoma     | T2N0M0   | II A  | 0/14  | 6              |
| 22  | 45  | F   | Breast     | metaplastic carcinoma           | T2N0M0   | II A  | 0/17  | 6              |
| 23  | 42  | F   | Breast     | infiltrating duct carcinoma     | T2N3aM0  | III C | 12/26 | 6              |
| 24  | 47  | F   | Breast     | infiltrating duct carcinoma     | T2N1mIM0 | II B  | 1/11  | 6              |
| 25  | 39  | F   | Breast     | infiltrating duct carcinoma     | T2N1aM0  | II B  | 2/17  | 6              |
| 26  | 51  | F   | Breast     | infiltrating duct carcinoma     | T2N1aM0  | II B  | 1/13  | 6              |
| 27  | 49  | F   | Breast     | infiltrating duct carcinoma     | T2N0M0   | II A  | 0/20  | 6              |
| 28  | 57  | F   | Breast     | infiltrating duct carcinoma     | T3N1aM0  | III A | 3/7   | 6              |
| 29  | 52  | F   | Breast     | infiltrating duct carcinoma     | T2N1aM0  | II B  | 1/22  | 6              |
| 30  | 41  | F   | Breast     | infiltrating duct carcinoma     | T3N2aM0  | III A | 7/9   | 6              |
| 31  | 48  | F   | Breast     | infiltrating duct carcinoma     | T2N3aM0  | III C | 35/35 | 6              |
| 32  | 34  | F   | Breast     | infiltrating duct carcinoma     | T2N1aM0  | II B  | 2/11  | 6              |
| 33  | 37  | F   | Breast     | infiltrating duct carcinoma     | T2N3aM0  | III C | 22/23 | 6              |
| 34  | 58  | F   | Breast     | infiltrating duct carcinoma     | T2N3aM0  | III C | 19/22 | 6              |
| 35  | 37  | F   | Breast     | infiltrating duct carcinoma     | T2N3aM0  | III C | 17/19 | 6              |
| 36  | 66  | F   | Breast     | infiltrating duct carcinoma     | T2N2aM0  | III A | 4/11  | 6              |
| 37  | 51  | F   | Breast     | infiltrating duct carcinoma     | T2N1aM0  | II B  | 3/16  | 6              |
| 38  | 41  | F   | Breast     | infiltrating duct carcinoma     | T2N3aM0  | III C | 15/21 | 6              |
| 39  | 56  | F   | Breast     | infiltrating duct carcinoma     | T3N2aM0  | III A | 5/13  | 6              |
| 40  | 47  | F   | Breast     | infiltrating duct carcinoma     | T3N3aM0  | III C | 11/13 | 6              |
| 41  | 48  | F   | Lymph node | metastatic carcinoma from #31   | -        | -     | -     | 6              |
| 42  | 34  | F   | Lymph node | metastatic carcinoma from #32   | -        | -     | -     | 6              |
| 43  | 37  | F   | Lymph node | metastatic carcinoma from #33   | -        | -     | -     | 6              |
| 44  | 58  | F   | Lymph node | metastatic carcinoma from #34   | -        | -     | -     | 6              |
| 45  | 37  | F   | Lymph node | metastatic carcinoma from #35   | -        | -     | -     | 6              |
| 46  | 66  | F   | Lymph node | metastatic carcinoma from #36   | -        | -     | -     | 6              |
| 47  | 51  | F   | Lymph node | metastatic carcinoma from #37   | -        | -     | -     | 6              |
| 48  | 41  | F   | Lymph node | metastatic carcinoma from #38   | -        | -     | -     | 6              |
| 49  | 56  | F   | Lymph node | metastatic carcinoma from #39   | -        | -     | -     | 6              |
| 50  | 47  | F   | Lymph node | metastatic carcinoma from #40   | -        | -     | -     | 6              |
| 51  | 37  | F   | Breast     | normal (match to #5)            | -        | -     | -     | 3              |
| 52  | 48  | F   | Breast     | normal (match to #31)           | -        | -     | -     | 3              |
| 53  | 36  | F   | Breast     | normal (match to #8)            | -        | -     | -     | 3              |
| 54  | 40  | F   | Breast     | normal (match to #10)           | -        | -     | -     | 3              |
| 55  | 51  | F   | Breast     | normal (match to #11)           | -        | -     | -     | 3              |
| 56  | 55  | F   | Breast     | normal (match to #12)           | -        | -     | -     | 3              |
| 57  | 60  | F   | Breast     | normal (match to #13)           | -        | -     | -     | 3              |
| 58  | 58  | F   | Breast     | normal (match to #34)           | -        | -     | -     | 3              |
| 59  | 37  | F   | Breast     | normal (match to #35)           | -        | -     | -     | 3              |
| 60  | -   | -   | Carbon     | -                               | -        | -     | -     | -              |

TNM and stage : AJCC Cancer Staging Manual (7th Edition)

\* LN, positive lymph nodes / examined lymph nodes

51-60: Non-neoplastic breast tissue in breast cancer patients.

\*\*Tissue type: See General Information sheet

Supplementary data sheet contains ER, PR, p53, C-erbB2, histologic grade, tumor size and survival data (available by web)



CBA4 Supplementary data

| No. | ER* | PR* | p53 | C-erbB2 | Histologic grade** | Tumor size | Follow-up months | Follow-up result | Cause of death | Remark |
|-----|-----|-----|-----|---------|--------------------|------------|------------------|------------------|----------------|--------|
| 1   | +   | +   | +   | -       | II                 | 3.0 cm     | 84               | alive            | .              | .      |
| 2   | -   | +   | -   | -       | II                 | 3.5 cm     | 84               | alive            | .              | .      |
| 3   | -   | +   | -   | -       | II                 | 4.2 cm     | 84               | alive            | .              | .      |
| 4   | +   | -   | -   | +       | III                | 3.0 cm     | 34               | dead             | cancer         | .      |
| 5   | -   | -   | -   | -       | III                | 2.5 cm     | 84               | alive            | .              | .      |
| 6   | +   | -   | +   | -       | II                 | 2.5 cm     | 83               | alive            | .              | .      |
| 7   | +   | -   | +   | -       | II                 | 10.0 cm    | 57               | dead             | cancer         | .      |
| 8   | -   | -   | -   | -       | II                 | 6.0 cm     | 82               | alive            | .              | .      |
| 9   | -   | -   | +   | -       | III                | 2.5 cm     | 82               | alive            | .              | .      |
| 10  | -   | -   | +   | -       | II                 | 4.5 cm     | 82               | alive            | .              | .      |
| 11  | -   | -   | -   | +       | III                | 2.5 cm     | 82               | alive            | .              | .      |
| 12  | +   | +   | -   | -       | III                | 3.0 cm     | 80               | alive            | .              | .      |
| 13  | -   | -   | +   | -       | III                | 2.5 cm     | 79               | alive            | .              | .      |
| 14  | -   | -   | +   | +       | III                | 5.0 cm     | 38               | dead             | cancer         | .      |
| 15  | +   | -   | -   | -       | III                | 5.2 cm     | 79               | alive            | .              | .      |
| 16  | +   | +   | -   | -       | II                 | 2.2 cm     | 78               | alive            | .              | .      |
| 17  | -   | +   | -   | -       | II                 | 2.5 cm     | 78               | alive            | .              | .      |
| 18  | +   | +   | -   | -       | uk                 | 4.5 cm     | 77               | alive            | .              | .      |
| 19  | -   | -   | +   | -       | III                | 5.5 cm     | 77               | alive            | .              | .      |
| 20  | -   | -   | -   | -       | uk                 | 2.5 cm     | 77               | alive            | .              | .      |
| 21  | +   | +   | +   | -       | III                | 4.5 cm     | 77               | alive            | .              | .      |
| 22  | -   | -   | -   | -       | uk                 | 3.5 cm     | 77               | alive            | .              | .      |
| 23  | +   | +   | -   | -       | II                 | 3.0 cm     | 76               | alive            | .              | .      |
| 24  | -   | +   | +   | +       | II                 | 3.0 cm     | 76               | alive            | .              | .      |
| 25  | -   | -   | +   | +       | III                | 2.5 cm     | 76               | alive            | .              | .      |
| 26  | +   | +   | -   | +       | III                | 4.0 cm     | 76               | alive            | .              | .      |
| 27  | +   | -   | +   | -       | III                | 2.5 cm     | 78               | alive            | .              | .      |
| 28  | +   | -   | -   | -       | II                 | 5.5 cm     | 75               | alive            | .              | .      |
| 29  | -   | -   | -   | -       | II                 | 5.0 cm     | 75               | alive            | .              | .      |
| 30  | -   | -   | -   | +       | II                 | 10.0 cm    | 59               | dead             | cancer         | .      |
| 31  | -   | -   | +   | -       | III                | 3.5 cm     | 9                | dead             | cancer         | .      |
| 32  | -   | -   | -   | -       | III                | 3.0 cm     | 82               | alive            | .              | .      |
| 33  | -   | -   | +   | -       | III                | 2.5 cm     | 81               | alive            | .              | .      |
| 34  | -   | -   | +   | +       | III                | 3.5 cm     | 9                | dead             | cancer         | .      |
| 35  | -   | -   | -   | +       | III                | 4.5 cm     | 78               | alive            | .              | .      |
| 36  | -   | -   | -   | -       | III                | 5.0 cm     | 75               | alive            | .              | .      |
| 37  | -   | -   | +   | -       | III                | 3.0 cm     | 73               | alive            | .              | .      |
| 38  | -   | -   | -   | +       | III                | 3.5 cm     | 72               | alive            | .              | .      |
| 39  | -   | -   | +   | +       | II                 | 6.0 cm     | 72               | alive            | .              | .      |
| 40  | -   | -   | +   | -       | II                 | 10.0 cm    | 33               | dead             | cancer         | .      |
| 41  | -   | -   | +   | -       | .                  | .          | .                | .                | .              | .      |
| 42  | -   | -   | -   | -       | .                  | .          | .                | .                | .              | .      |
| 43  | -   | -   | +   | -       | .                  | .          | .                | .                | .              | .      |
| 44  | -   | -   | +   | +       | .                  | .          | .                | .                | .              | .      |
| 45  | -   | -   | -   | +       | .                  | .          | .                | .                | .              | .      |
| 46  | -   | -   | -   | -       | .                  | .          | .                | .                | .              | .      |
| 47  | -   | -   | +   | -       | .                  | .          | .                | .                | .              | .      |
| 48  | -   | -   | -   | +       | .                  | .          | .                | .                | .              | .      |
| 49  | -   | -   | +   | +       | .                  | .          | .                | .                | .              | .      |
| 50  | -   | -   | +   | -       | .                  | .          | .                | .                | .              | .      |
| 51  | .   | .   | .   | .       | .                  | .          | .                | .                | .              | .      |
| 52  | .   | .   | .   | .       | .                  | .          | .                | .                | .              | .      |
| 53  | .   | .   | .   | .       | .                  | .          | .                | .                | .              | .      |
| 54  | .   | .   | .   | .       | .                  | .          | .                | .                | .              | .      |
| 55  | .   | .   | .   | .       | .                  | .          | .                | .                | .              | .      |
| 56  | .   | .   | .   | .       | .                  | .          | .                | .                | .              | .      |
| 57  | .   | .   | .   | .       | .                  | .          | .                | .                | .              | .      |
| 58  | .   | .   | .   | .       | .                  | .          | .                | .                | .              | .      |
| 59  | .   | .   | .   | .       | .                  | .          | .                | .                | .              | .      |
| 60  | .   | .   | .   | .       | .                  | .          | .                | .                | .              | .      |

\*ER, estrogen receptor; PR, progesteron receptor; p53; C-erbB2; immunohistochemistry; uk, unknown  
 \*\*Histologic grade, Nottingham modification of Bloom-Richard system

# Patients information of Breast cancer-normal tissue microarray

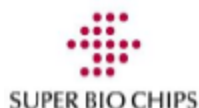

118-88 Yongdu-dong, Seoul 130-820, Korea  
 Tel +82 2 3676 8270 Fax +82 2 3676 8269  
 www.tissue-array.com info@tissue-array.com

## CBB3 Human, Breast cancer-normal

| No. | Age | Sex | Organ  | Diagnosis                     | pTNM    | Stage | LN*   | C-erbB2 | Tissue type** |
|-----|-----|-----|--------|-------------------------------|---------|-------|-------|---------|---------------|
| 1   | 28  | F   | Breast | infiltrating duct carcinoma   | T3N3aM1 | IV    | 12/15 | -       | 6             |
| 2   |     |     |        |                               |         |       |       |         |               |
| 3   |     |     |        |                               |         |       |       |         |               |
| 4   | 47  | F   | Breast | infiltrating duct carcinoma   | T2N2aM0 | III A | 5/22  | -       | 6             |
| 5   |     |     |        |                               |         |       |       |         |               |
| 6   | 39  | F   | Breast | infiltrating duct carcinoma   | T2N0M0  | II A  | 0/16  | -       | 6             |
| 7   |     |     |        |                               |         |       |       |         |               |
| 8   | 48  | F   | Breast | infiltrating duct carcinoma   | T2N2aM0 | III A | 5/22  | -       | 6             |
| 9   |     |     |        |                               |         |       |       |         |               |
| 10  | 60  | F   | Breast | infiltrating duct carcinoma   | T2N0M0  | II A  | 0/9   | +       | 6             |
| 11  |     |     |        |                               |         |       |       |         |               |
| 12  | 54  | F   | Breast | infiltrating duct carcinoma   | T3N1aM1 | IV    | 1/16  | +       | 6             |
| 13  |     |     |        |                               |         |       |       |         |               |
| 14  | 43  | F   | Breast | infiltrating duct carcinoma   | T3N0M0  | II B  | 0/9   | +       | 6             |
| 15  |     |     |        |                               |         |       |       |         |               |
| 16  | 42  | F   | Breast | infiltrating duct carcinoma   | T2N2aM0 | III A | 5/19  | -       | 6             |
| 17  |     |     |        |                               |         |       |       |         |               |
| 18  | 40  | F   | Breast | infiltrating duct carcinoma   | T2N3aM0 | III C | 18/21 | -       | 6             |
| 19  |     |     |        |                               |         |       |       |         |               |
| 20  | 41  | F   | Breast | infiltrating duct carcinoma   | T2N1aM0 | II B  | 2/18  | -       | 6             |
| 21  |     |     |        |                               |         |       |       |         |               |
| 22  | 57  | F   | Breast | infiltrating duct carcinoma   | T2N3aM0 | III C | 15/24 | -       | 6             |
| 23  |     |     |        |                               |         |       |       |         |               |
| 24  | 44  | F   | Breast | infiltrating duct carcinoma   | T2N3aM0 | III C | 28/28 | +       | 6             |
| 25  |     |     |        |                               |         |       |       |         |               |
| 26  | 84  | F   | Breast | infiltrating duct carcinoma   | T2N0M0  | II A  | 0/18  | -       | 6             |
| 27  |     |     |        |                               |         |       |       |         |               |
| 28  | 52  | F   | Breast | infiltrating duct carcinoma   | T2N1aM0 | II B  | 1/14  | -       | 6             |
| 29  |     |     |        |                               |         |       |       |         |               |
| 30  | 40  | F   | Breast | infiltrating duct carcinoma   | T2N0M0  | II A  | 0/10  | -       | 6             |
| 31  |     |     |        |                               |         |       |       |         |               |
| 32  | 28  | F   | Breast | normal (match to #1 and #2)   | .       | .     | .     | .       | 3             |
| 33  |     |     |        |                               |         |       |       |         |               |
| 34  | 47  | F   | Breast | normal (match to #3 and #4)   | .       | .     | .     | .       | 3             |
| 35  |     |     |        |                               |         |       |       |         |               |
| 36  | 39  | F   | Breast | normal (match to #5 and #6)   | .       | .     | .     | .       | 3             |
| 37  |     |     |        |                               |         |       |       |         |               |
| 38  | 48  | F   | Breast | normal (match to #7 and #8)   | .       | .     | .     | .       | 3             |
| 39  |     |     |        |                               |         |       |       |         |               |
| 40  | 60  | F   | Breast | normal (match to #9 and #10)  | .       | .     | .     | .       | 3             |
| 41  |     |     |        |                               |         |       |       |         |               |
| 42  | 54  | F   | Breast | normal (match to #11 and #12) | .       | .     | .     | .       | 3             |
| 43  |     |     |        |                               |         |       |       |         |               |
| 44  | 43  | F   | Breast | normal (match to #13 and #14) | .       | .     | .     | .       | 3             |
| 45  |     |     |        |                               |         |       |       |         |               |
| 46  | 42  | F   | Breast | normal (match to #15 and #16) | .       | .     | .     | .       | 3             |
| 47  |     |     |        |                               |         |       |       |         |               |
| 48  | 40  | F   | Breast | normal (match to #17 and #18) | .       | .     | .     | .       | 3             |
| 49  |     |     |        |                               |         |       |       |         |               |
| 50  | 41  | F   | Breast | normal (match to #19 and #20) | .       | .     | .     | .       | 3             |
| 51  |     |     |        |                               |         |       |       |         |               |
| 52  | 57  | F   | Breast | normal (match to #21 and #22) | .       | .     | .     | .       | 3             |
| 53  |     |     |        |                               |         |       |       |         |               |
| 54  | 44  | F   | Breast | normal (match to #23 and #24) | .       | .     | .     | .       | 3             |
| 55  |     |     |        |                               |         |       |       |         |               |
| 56  | 84  | F   | Breast | normal (match to #25 and #26) | .       | .     | .     | .       | 3             |
| 57  |     |     |        |                               |         |       |       |         |               |
| 58  | 52  | F   | Breast | normal (match to #27 and #28) | .       | .     | .     | .       | 3             |
| 59  |     |     |        |                               |         |       |       |         |               |
| 60  | 40  | F   | Breast | normal (match to #29 and #30) | .       | .     | .     | .       | 3             |

TNM and Stage: AJCC Cancer Staging Manual (7th Edition)

\* LN, metastatic lymph nodes / examined lymph nodes

\*\*Tissue type: see General information sheet.

Supplementary data sheet contains ER, PR, p53, histologic grade, tumor size and survival data (available by web)



# Patients information of melanoma tissue microarray

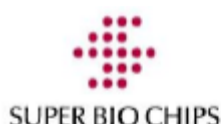

118-88 Yongdu-dong, Seoul 130-820, Korea  
 Tel +82 2 3676 8270 Fax +82 2 3676 8269  
 www.tissue-array.com info@tissue-array.com

## CK2 Human, Malignant melanoma

| No. | Age | Sex | Organ                  | Diagnosis                      | Tissue type |
|-----|-----|-----|------------------------|--------------------------------|-------------|
| 1   | 37  | F   | Skin, toe              | malignant melanoma             | 6           |
| 2   | 53  | M   | Skin, hip              | malignant melanoma             | 6           |
| 3   | 43  | M   | Eyeball (1.0 cm)       | malignant melanoma             | 6           |
| 4   | 65  | F   | Skin, sole             | malignant melanoma             | 6           |
| 5   | 47  | M   | Skin, hand             | malignant melanoma             | 6           |
| 6   | 25  | F   | Skin, neck             | malignant melanoma             | 6           |
| 7   | 20  | M   | Skin, elbow            | malignant melanoma             | 6           |
| 8   | 20  | F   | Skin, trunk            | malignant melanoma             | 6           |
| 9   | 73  | F   | Skin, abdomen          | malignant melanoma             | 6           |
| 10  | 66  | M   | Soft tissue, axilla    | malignant melanoma             | 6           |
| 11  | 43  | M   | Skin, heel             | malignant melanoma             | 6           |
| 12  | 56  | M   | Soft tissue, popliteal | malignant melanoma             | 6           |
| 13  | 33  | F   | Skin, buttock          | malignant melanoma             | 6           |
| 14  | 19  | M   | Skin, axilla           | malignant melanoma             | 6           |
| 15  | 55  | M   | Lung                   | metastatic malignant melanoma  | 6           |
| 16  | 63  | M   | Anus                   | malignant melanoma             | 6           |
| 17  | 63  | F   | Lymph node, axilla     | metastatic malignant melanoma  | 6           |
| 18  | 59  | M   | Lung                   | metastatic malignant melanoma  | 6           |
| 19  | 77  | M   | Anus                   | malignant melanoma             | 6           |
| 20  | 36  | F   | Soft tissue, leg       | malignant melanoma             | 6           |
| 21  | 47  | M   | Soft tissue, axilla    | malignant melanoma soft tissue | 6           |
| 22  | 35  | F   | Lymph node, inguinal   | metastatic malignant melanoma  | 6           |
| 23  | 59  | F   | Nasal cavity           | malignant melanoma             | 6           |
| 24  | 36  | F   | Lymph node, inguinal   | metastatic malignant melanoma  | 6           |
| 25  | 65  | M   | Lymph node             | metastatic melanoma            | 6           |
| 26  | 62  | F   | Skin, forearm          | malignant melanoma             | 6           |
| 27  | 47  | M   | Lymph node             | metastatic malignant melanoma  | 6           |
| 28  | 57  | F   | Lymph node, inguinal   | metastatic malignant melanoma  | 6           |
| 29  | 68  | M   | Skin, leg              | nodular malignant melanoma     | 6           |
| *30 | 46  | M   | Soft tissue, inguinal  | malignant melanoma             | 6           |
| 31  | 37  | M   | Skin, axilla           | malignant melanoma             | 6           |
| 32  | 76  | M   | Skin, axilla           | malignant melanoma             | 6           |
| 33  | 49  | M   | Rectum                 | malignant melanoma             | 6           |
| *34 | 54  | F   | Skin, scalp            | malignant melanoma             | 6           |
| 35  | 59  | M   | Skin, back             | malignant melanoma             | 6           |
| 36  | 34  | F   | Skin, axilla           | malignant melanoma             | 6           |
| *37 | 60  | M   | Femur                  | metastatic carcinoma           | 6           |
| 38  | 62  | F   | Lymph node, inguinal   | metastatic malignant melanoma  | 6           |
| 39  | 80  | M   | Skin, big toe          | malignant melanoma             | 6           |
| 40  | 34  | M   | Eyeball (1.0 cm)       | malignant melanoma             | 6           |
| 41  | 63  | M   | Skin, lower leg        | malignant melanoma             | 6           |
| *42 | 74  | F   | Skin, face             | malignant melanoma             | 6           |
| 43  | 56  | M   | Skin, foot             | malignant melanoma             | 6           |
| 44  | 65  | M   | Eyeball (1.7cm)        | malignant melanoma             | 6           |
| 45  | 66  | F   | Lymph node, inguinal   | metastatic malignant melanoma  | 6           |
| 46  | 53  | M   | Eyeball (1.8cm)        | malignant melanoma             | 6           |
| 47  | 70  | F   | Skin, face             | malignant melanoma             | 6           |
| 48  | 47  | M   | Lymph node             | metastatic malignant melanoma  | 6           |
| 49  | 38  | F   | Rectum                 | malignant melanoma             | 6           |
| 50  | 61  | M   | Nasal cavity           | malignant melanoma             | 6           |
| 51  | 64  | F   | Lymph node             | metastatic malignant melanoma  | 6           |
| 52  | 43  | M   | Skin, forearm          | malignant melanoma             | 6           |
| 53  | 41  | M   | Skin, thigh            | malignant melanoma             | 6           |
| 54  | 71  | M   | Lymph node             | metastatic malignant melanoma  | 6           |
| 55  | 61  | M   | Maxilla                | malignant melanoma             | 6           |
| 56  | 70  | M   | Maxilla                | malignant melanoma             | 6           |
| 57  | 39  | F   | Small bowel            | metastatic malignant melanoma  | 6           |
| 58  | 74  | M   | Skin, inguinal         | malignant melanomas            | 6           |
| 59  | 55  | M   | Skin, sole             | malignant melanoma             | 6           |
| 60  | .   | .   | Carbon                 | .                              | .           |

30\*: Definite diagnosis in question, possibility of paraganglioma

34\*: Undifferentiated carcinoma is considered as an alternative diagnosis

37\*: Initial diagnosis was malignant melanoma. The diagnosis was revised as metastatic carcinoma

42\*: malignant melanoma with osteocartilagenous differentiation

### CK2 Supplementary data

| No. | Follow-up months | Follow-up result | Cause of death  | Remark |
|-----|------------------|------------------|-----------------|--------|
| 1   | 144              | alive            | .               | .      |
| 2   | 5                | dead             | cancer          | .      |
| 3   | 139              | alive            | .               | .      |
| 4   | 124              | dead             | cancer          | .      |
| 5   | 34               | dead             | cancer          | .      |
| 6   | 4                | dead             | cancer          | .      |
| 7   | 130              | alive            | .               | .      |
| 8   | 28               | dead             | cancer          | .      |
| 9   | 8                | dead             | unknown         | .      |
| 10  | 4                | dead             | cancer          | .      |
| 11  | 2                | dead             | cancer          | .      |
| 12  | 18               | dead             | cancer          | .      |
| 13  | 36               | dead             | cancer          | .      |
| 14  | 120              | alive            | .               | .      |
| 15  | 114              | alive            | .               | .      |
| 16  | 17               | dead             | cancer          | .      |
| 17  | 42               | dead             | cancer          | .      |
| 18  | 13               | dead             | cancer          | .      |
| 19  | 24               | dead             | cancer          | .      |
| 20  | 13               | dead             | cancer          | .      |
| 21  | 22               | dead             | cancer          | .      |
| 22  | 16               | dead             | cancer          | .      |
| 23  | 26               | dead             | cancer          | .      |
| 24  | 5                | dead             | cancer          | .      |
| 25  | 27               | dead             | tetanus         | .      |
| 26  | 94               | alive            | .               | .      |
| 27  | 22               | dead             | cancer          | .      |
| 28  | 3                | dead             | cancer          | .      |
| 29  | 18               | dead             | cancer          | .      |
| *30 | 91               | alive            | .               | .      |
| 31  | 4                | dead             | cancer          | .      |
| 32  | 3                | dead             | liver cirrhosis | .      |
| 33  | 87               | alive            | .               | .      |
| *34 | 0                | dead             | cancer          | .      |
| 35  | 34               | dead             | cancer          | .      |
| 36  | 74               | alive            | .               | .      |
| *37 | 1                | dead             | cancer          | .      |
| 38  | 71               | alive            | .               | .      |
| 39  | 25               | dead             | cancer          | .      |
| 40  | 70               | alive            | .               | .      |
| 41  | 6                | dead             | cancer          | .      |
| *42 | 68               | alive            | .               | .      |
| 43  | 67               | alive            | .               | .      |
| 44  | 25               | dead             | cancer          | .      |
| 45  | 65               | alive            | .               | .      |
| 46  | 52               | dead             | cancer          | .      |
| 47  | 64               | alive            | .               | .      |
| 48  | 21               | dead             | cancer          | .      |
| 49  | 8                | dead             | cancer          | .      |
| 50  | 19               | dead             | cancer          | .      |
| 51  | 6                | dead             | cancer          | .      |
| 52  | 1                | dead             | cancer          | .      |
| 53  | 17               | dead             | cancer          | .      |
| 54  | 41               | alive            | .               | .      |
| 55  | 12               | dead             | cancer          | .      |
| 56  | 10               | dead             | cancer          | .      |
| 57  | 8                | dead             | cancer          | .      |
| 58  | 5                | dead             | cancer          | .      |
| 59  | 6                | dead             | cancer          | .      |
| 60  | .                | .                | .               | .      |



# Patients information of liver cancer tissue microarray

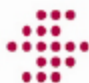

SUPER BIO CHIPS

118-88 Yongdu-dong, Seoul 130-820, Korea

Tel +82 2 3676 8270 Fax +82 2 3676 8269

www.tissue-array.com info@tissue-array.com

## CS4 Human, Liver cancer

| No. | Age | Sex | Organ           | Diagnosis                                                             | pTNM    | Stage | No. of CSN4# | Tissue type <sup>†</sup> |
|-----|-----|-----|-----------------|-----------------------------------------------------------------------|---------|-------|--------------|--------------------------|
| 1   | 53  | F   | Skin            | metastatic hepatocellular carcinoma                                   | TxNxM1  | IVB   | .            | 6                        |
| 2   | 57  | M   | Liver           | hepatocellular carcinoma                                              | T3aN0M0 | IIIA  | 104          | 6                        |
| 3   | 41  | M   | Liver           | hepatocellular carcinoma                                              | T3aN0M0 | IIIA  | .            | 6                        |
| 4   | 45  | M   | Skin            | metastatic hepatocellular carcinoma                                   | TxNxM1  | IVB   | .            | 6                        |
| 5   | 54  | F   | Chest wall      | metastatic hepatocellular carcinoma                                   | TxNxM1  | IVB   | .            | 6                        |
| 6   | 40  | M   | Lumbar vertebra | metastatic hepatocellular carcinoma                                   | TxNxM1  | IVB   | .            | 6                        |
| 7   | 52  | M   | Liver           | hepatocellular carcinoma                                              | T3aN0M0 | IIIA  | 112          | 6                        |
| 8   | 43  | M   | Bile duct       | hepatocellular carcinoma                                              | T4NxM0  | IIIC  | .            | 6                        |
| 9   | 51  | M   | Colon           | metastatic hepatocellular carcinoma                                   | TxNxM1  | IVB   | .            | 6                        |
| 10  | 49  | M   | Bile duct       | hepatocellular carcinoma                                              | T4NxM0  | IIIC  | .            | 6                        |
| 11  | 56  | M   | Liver           | hepatocellular carcinoma                                              | T1N0M0  | I     | .            | 6                        |
| 12  | 56  | F   | Lung            | metastatic hepatocellular carcinoma                                   | TxNxM1  | IVB   | .            | 6                        |
| 13  | 40  | M   | Lymph node      | metastatic hepatocellular carcinoma                                   | T3aN1M0 | IVA   | .            | 6                        |
| 14  | 37  | M   | Liver           | hepatocellular carcinoma                                              | T4NxM1  | IVB   | 131          | 6                        |
| 15  | 75  | M   | Liver           | hepatocellular carcinoma                                              | T2N0M0  | II    | 132          | 6                        |
| 16  | 37  | M   | Neck            | metastatic hepatocellular carcinoma                                   | TxNxM1  | IVB   | .            | 6                        |
| 17  | 32  | M   | Liver           | combined hepatocellular carcinoma & cholangiocarcinoma                | T3aN0M0 | IIIA  | 133          | 6                        |
| 18  | 50  | M   | Femur           | metastatic hepatocellular carcinoma                                   | TxNxM1  | IVB   | .            | 6                        |
| 19  | 57  | M   | Liver           | hepatocellular carcinoma                                              | T3aN0M0 | IIIA  | 134          | 6                        |
| 20  | 62  | M   | Lung            | metastatic hepatocellular carcinoma                                   | TxNxM1  | IVB   | .            | 6                        |
| 21  | 61  | M   | Lung            | metastatic hepatocellular carcinoma                                   | TxNxM1  | IVB   | .            | 6                        |
| 22  | 65  | M   | Liver           | hepatocellular carcinoma, moderately differentiated                   | T1N0M0  | I     | 135          | 6                        |
| 23  | 64  | M   | Liver           | hepatocellular carcinoma, moderately differentiated                   | T3bN0M0 | IIIB  | .            | 6                        |
| 24  | 65  | M   | Liver           | hepatocellular carcinoma, poorly differentiated                       | T3aN0M0 | IIIA  | 137          | 6                        |
| 25  | 72  | M   | Liver           | hepatocellular carcinoma, well differentiated & poorly differentiated | T2N0M0  | II    | 138          | 6                        |
| 26  | 58  | F   | Liver           | hepatocellular carcinoma, well differentiated                         | T2N0M0  | II    | 139          | 6                        |
| 27  | 52  | M   | Liver           | hepatocellular carcinoma, well differentiated                         | T2N0M0  | II    | 140          | 6                        |
| 28  | 40  | M   | Liver           | hepatocellular carcinoma, moderately differentiated                   | T2N0M0  | II    | 141          | 6                        |
| 29  | 53  | F   | Liver           | hepatocellular carcinoma, moderately differentiated                   | T3bN0M0 | IIIB  | 142          | 6                        |
| 30  | 67  | M   | Liver           | hepatocellular carcinoma, moderately differentiated                   | T2N0M0  | II    | 143          | 6                        |
| 31  | 58  | F   | Liver           | hepatocellular carcinoma, moderately differentiated                   | T3aN0M0 | IIIA  | .            | 6                        |
| 32  | 20  | M   | Liver           | hepatocellular carcinoma, well differentiated                         | T4N0M0  | IIIC  | .            | 6                        |
| 33  | 48  | M   | Liver           | hepatocellular carcinoma, moderately differentiated                   | T2N0M0  | II    | .            | 6                        |
| 34  | 47  | M   | Liver           | hepatocellular carcinoma                                              | T1N0M0  | I     | 144          | 6                        |
| 35  | 35  | M   | Omentum         | metastatic hepatocellular carcinoma                                   | TxNxM1  | IV    | .            | 6                        |
| 36  | 69  | F   | Liver           | hepatocellular carcinoma, moderately differentiated                   | T1N0M0  | I     | .            | 6                        |
| 37  | 46  | M   | Liver           | hepatocellular carcinoma, moderately differentiated                   | T1N0M0  | I     | .            | 6                        |
| 38  | 63  | F   | Liver           | hepatocellular carcinoma, moderately differentiated                   | T1N0M0  | I     | 146          | 6                        |
| 39  | 60  | F   | Liver           | hepatocellular carcinoma, poorly differentiated                       | T1N0M0  | I     | 147          | 6                        |
| 40  | 62  | M   | Liver           | hepatocellular carcinoma, moderately differentiated                   | T1N0M0  | I     | 148          | 6                        |
| 41  | 52  | M   | Liver           | hepatocellular carcinoma, moderately differentiated                   | T2N0M0  | II    | .            | 6                        |
| 42  | 66  | F   | Liver           | hepatocellular carcinoma, moderately differentiated                   | T2N0M0  | II    | 149          | 6                        |
| 43  | 65  | F   | Liver           | hepatocellular carcinoma, well differentiated                         | T1N0M0  | I     | 150          | 6                        |
| 44  | 64  | M   | Liver           | hepatocellular carcinoma, moderately differentiated                   | T3bN0M0 | IIIB  | .            | 6                        |
| 45  | 59  | M   | Liver           | hepatocellular carcinoma, poorly differentiated                       | T3bN0M0 | IIIB  | .            | 6                        |
| 46  | 64  | M   | Liver           | hepatocellular carcinoma, moderately differentiated                   | T1N0M0  | I     | 151          | 6                        |
| 47  | 54  | M   | Liver           | hepatocellular carcinoma, moderately differentiated                   | T3bN0M0 | IIIB  | 152          | 6                        |
| 48  | 65  | F   | Liver           | hepatocellular carcinoma, moderately differentiated                   | T1N0M0  | I     | 153          | 6                        |
| 49  | 60  | M   | Adrenal gland   | metastatic hepatocellular carcinoma                                   | TxNxM1  | IVB   | .            | 6                        |
| 50  | 44  | M   | Liver           | hepatocellular carcinoma, moderately differentiated                   | T1N0M0  | I     | .            | 6                        |
| 51  | 41  | M   | Liver           | hepatocellular carcinoma, moderately differentiated                   | T1N0M0  | I     | .            | 6                        |
| 52  | 51  | M   | Liver           | hepatocellular carcinoma                                              | T1N0M0  | I     | 154          | 6                        |
| 53  | 55  | M   | Liver           | hepatocellular carcinoma, well differentiated                         | T1N0M0  | I     | .            | 6                        |
| 54  | 57  | F   | Liver           | hepatocellular carcinoma, well differentiated                         | T1N0M0  | I     | 156          | 6                        |
| 55  | 57  | M   | Liver           | hepatocellular carcinoma, moderately differentiated                   | T3bN0M0 | IIIB  | 157          | 6                        |
| 56  | 43  | M   | Liver           | hepatocellular carcinoma, moderately differentiated                   | T1N0M0  | I     | .            | 6                        |
| 57  | 50  | M   | Liver           | hepatocellular carcinoma, poorly differentiated                       | T1N0M0  | I     | 158          | 6                        |
| 58  | 43  | M   | Liver           | hepatocellular carcinoma, moderately differentiated                   | T1N0M0  | I     | 159          | 6                        |
| 59  | 60  | F   | Liver           | hepatocellular carcinoma, poorly differentiated                       | T4N0M0  | IIIC  | .            | 6                        |
| 60  | .   | .   | Carbon          | .                                                                     | .       | .     | .            | .                        |

TNM and Stage: AJCC Cancer Staging Manual (7th Edition)

Tissue type<sup>†</sup>: see General information sheet

Supplementary data sheet contains survival data (available by web)

### CSA4 Supplementary data

| No. | Follow-up months | Follow-up result | Cause of death | Remark |
|-----|------------------|------------------|----------------|--------|
| 1   | 14               | dead             | cancer         | .      |
| 2   | 95               | alive            | .              | .      |
| 3   | 30               | dead             | cancer         | .      |
| 4   | 9                | dead             | cancer         | .      |
| 5   | 3                | dead             | cancer         | .      |
| 6   | 47               | dead             | cancer         | .      |
| 7   | 41               | dead             | cancer         | .      |
| 8   | 4                | dead             | cancer         | .      |
| 9   | 32               | dead             | cancer         | .      |
| 10  | 67               | alive            | .              | .      |
| 11  | 18               | dead             | cancer         | .      |
| 12  | 18               | dead             | unknown        | .      |
| 13  | 3                | dead             | cancer         | .      |
| 14  | 92               | dead             | cancer         | .      |
| 15  | 67               | alive            | .              | .      |
| 16  | 35               | dead             | cancer         | .      |
| 17  | 66               | alive            | .              | .      |
| 18  | 47               | dead             | cancer         | .      |
| 19  | 66               | alive            | .              | .      |
| 20  | 22               | dead             | cancer         | .      |
| 21  | 39               | dead             | cancer         | .      |
| 22  | 65               | alive            | .              | .      |
| 23  | 65               | alive            | .              | .      |
| 24  | 64               | alive            | .              | .      |
| 25  | 64               | alive            | .              | .      |
| 26  | 64               | alive            | .              | .      |
| 27  | 63               | alive            | .              | .      |
| 28  | 63               | alive            | .              | .      |
| 29  | 63               | alive            | .              | .      |
| 30  | 54               | alive            | .              | .      |
| 31  | 31               | dead             | cancer         | .      |
| 32  | 28               | dead             | cancer         | .      |
| 33  | 47               | alive            | .              | .      |
| 34  | 44               | alive            | .              | .      |
| 35  | 28               | dead             | cancer         | .      |
| 36  | 3                | dead             | cancer         | .      |
| 37  | 11               | dead             | cancer         | .      |
| 38  | 10               | dead             | cancer         | .      |
| 39  | 55               | alive            | .              | .      |
| 40  | 1                | dead             | cancer         | .      |
| 41  | 2                | dead             | cancer         | .      |
| 42  | 71               | alive            | .              | .      |
| 43  | 29               | dead             | cancer         | .      |
| 44  | 16               | dead             | cancer         | .      |
| 45  | 6                | dead             | cancer         | .      |
| 46  | 3                | dead             | cancer         | .      |
| 47  | 6                | dead             | cancer         | .      |
| 48  | 10               | dead             | cancer         | .      |
| 49  | 39               | alive            | .              | .      |
| 50  | 1                | dead             | cancer         | .      |
| 51  | .                | .                | .              | .      |
| 52  | .                | .                | .              | .      |
| 53  | .                | .                | .              | .      |
| 54  | .                | .                | .              | .      |
| 55  | .                | .                | .              | .      |
| 56  | .                | .                | .              | .      |
| 57  | .                | .                | .              | .      |
| 58  | .                | .                | .              | .      |
| 59  | .                | .                | .              | .      |
| 60  | .                | .                | .              | .      |



# Patients information of Stomach cancer tissue microarray

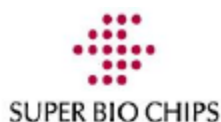

118-88 Yongdu-dong, Seoul 130-820, Korea  
 Tel +82 2 3676 8270 Fax +82 2 3676 8269  
 www.tissue-array.com info@tissue-array.com

## CQ2 Human, Stomach cancer

| No. | Age | Sex | Organ   | Diagnosis                                 | pTNM     | Stage | No. of CQ2* | Tissue type** |
|-----|-----|-----|---------|-------------------------------------------|----------|-------|-------------|---------------|
| 1   | 40  | M   | Stomach | adenocarcinoma, poorly differentiated     | T4aN3aM1 | IV    | 101         | 6             |
| 2   | 43  | F   | Stomach | adenocarcinoma, poorly differentiated     | T4aN0M0  | II B  | 102         | 6             |
| 3   | 61  | F   | Stomach | adenocarcinoma, moderately differentiated | T3N3aM0  | III B | 103         | 6             |
| 4   | 45  | F   | Stomach | signet ring cell carcinoma                | T3N3aM0  | III B | 104         | 6             |
| 5   | 67  | M   | Stomach | adenocarcinoma, poorly differentiated     | T3N1M0   | II B  | 105         | 6             |
| 6   | 53  | F   | Stomach | adenocarcinoma, poorly differentiated     | T3N3aM0  | III B | 106         | 6             |
| 7   | 67  | M   | Stomach | adenocarcinoma, moderately differentiated | T4aN3bM0 | III C | 107         | 6             |
| 8   | 72  | M   | Stomach | adenocarcinoma, poorly differentiated     | T3N3aM0  | III B | 108         | 6             |
| 9   | 61  | M   | Stomach | mucinous adenocarcinoma                   | T1bN2M0  | II A  | 109         | 6             |
| 10  | 65  | M   | Stomach | adenocarcinoma, poorly differentiated     | T4aN0M0  | II B  | 110         | 6             |
| 11  | 70  | M   | Stomach | adenocarcinoma, moderately differentiated | T4aN2M0  | III B | 111         | 6             |
| 12  | 62  | M   | Stomach | adenocarcinoma, well differentiated       | T3N2M0   | III A | 112         | 6             |
| 13  | 62  | F   | Stomach | signet ring cell carcinoma                | T3N2M0   | III A | 113         | 6             |
| 14  | 52  | M   | Stomach | papillary adenocarcinoma                  | T2N0M0   | I B   | 114         | 6             |
| 15  | 60  | M   | Stomach | adenocarcinoma, poorly differentiated     | T3N3aM1  | IV    | 115         | 6             |
| 16  | 66  | M   | Stomach | adenocarcinoma, poorly differentiated     | T4aN3bM0 | III C | 116         | 6             |
| 17  | 41  | M   | Stomach | signet ring cell carcinoma                | T3N3aM0  | III B | 117         | 6             |
| 18  | 60  | F   | Stomach | adenocarcinoma, poorly differentiated     | T3N3aM0  | III B | 118         | 6             |
| 19  | 59  | M   | Stomach | adenocarcinoma, poorly differentiated     | T4aN3bM0 | III C | 119         | 6             |
| 20  | 62  | M   | Stomach | adenocarcinoma, poorly differentiated     | T3N3bM0  | III B | 120         | 6             |
| 21  | 49  | M   | Stomach | adenocarcinoma, poorly differentiated     | T4bN3bM0 | III C | 121         | 6             |
| 22  | 64  | M   | Stomach | mucinous adenocarcinoma                   | T3N1M0   | II B  | 122         | 6             |
| 23  | 55  | M   | Stomach | undifferentiated carcinoma                | T4aN3bM0 | III C | 123         | 6             |
| 24  | 56  | F   | Stomach | adenocarcinoma, poorly differentiated     | T3N2M0   | III A | 124         | 6             |
| 25  | 48  | M   | Stomach | adenocarcinoma, poorly differentiated     | T3N2M0   | III A | 125         | 6             |
| 26  | 65  | F   | Stomach | mucinous adenocarcinoma                   | T4aN3aM0 | III C | 126         | 6             |
| 27  | 63  | M   | Stomach | adenocarcinoma, well differentiated       | T3N2M0   | III A | 127         | 6             |
| 28  | 60  | M   | Stomach | adenocarcinoma, well differentiated       | T3N0M0   | II A  | 128         | 6             |
| 29  | 42  | M   | Stomach | signet ring cell carcinoma                | T3N1M0   | II B  | 129         | 6             |
| 30  | 55  | M   | Stomach | mucinous adenocarcinoma                   | T3N3aM0  | III B | 130         | 6             |
| 31  | 58  | M   | Stomach | adenocarcinoma, moderately differentiated | T3N3bM0  | III B | 131         | 6             |
| 32  | 72  | F   | Stomach | adenocarcinoma, moderately differentiated | T1bN2M0  | II A  | .           | 6             |
| 33  | 53  | M   | Stomach | adenocarcinoma, poorly differentiated     | T3N0M0   | II A  | 133         | 6             |
| 34  | 46  | M   | Stomach | adenocarcinoma, poorly differentiated     | T4bN0M0  | III B | 134         | 6             |
| 35  | 64  | M   | Stomach | adenocarcinoma, moderately differentiated | T2N1M0   | II A  | 135         | 6             |
| 36  | 65  | M   | Stomach | adenocarcinoma, poorly differentiated     | T2N1M0   | II A  | 136         | 6             |
| 37  | 45  | F   | Stomach | adenocarcinoma, poorly differentiated     | T2N1M0   | II A  | 137         | 6             |
| 38  | 58  | F   | Stomach | adenocarcinoma, well differentiated       | T3N0M0   | II A  | 138         | 6             |
| 39  | 68  | F   | Stomach | adenocarcinoma, poorly differentiated     | T3N3aM1  | IV    | 139         | 6             |
| 40  | 66  | M   | Stomach | adenocarcinoma, poorly differentiated     | T4aN3aM0 | III C | 140         | 6             |
| 41  | 63  | M   | Stomach | adenocarcinoma, poorly differentiated     | T3N0M0   | II A  | 141         | 6             |
| 42  | 52  | F   | Stomach | adenocarcinoma, moderately differentiated | T3N2M0   | III A | 142         | 6             |
| 43  | 35  | F   | Stomach | adenocarcinoma, poorly differentiated     | T1aN0M0  | I A   | 143         | 6             |
| 44  | 44  | F   | Stomach | adenocarcinoma, well differentiated       | T1bN0M0  | I A   | 144         | 6             |
| 45  | 55  | M   | Stomach | adenocarcinoma, well differentiated       | T1aN0M0  | I A   | 145         | 6             |
| 46  | 40  | M   | Stomach | signet ring cell carcinoma                | T1aN0M0  | I A   | 146         | 6             |
| 47  | 66  | M   | Stomach | adenocarcinoma, moderately differentiated | T1bN0M0  | I A   | 147         | 6             |
| 48  | 65  | F   | Stomach | adenocarcinoma, moderately differentiated | T1bN0M0  | I A   | 148         | 6             |
| 49  | 62  | F   | Stomach | adenocarcinoma, poorly differentiated     | T1bN0M0  | I A   | 149         | 6             |
| 50  | 60  | F   | Stomach | adenocarcinoma, moderately differentiated | T1bN0M0  | I A   | .           | 6             |
| 51  | 70  | F   | Stomach | adenocarcinoma, moderately differentiated | T1bN1M0  | I B   | 151         | 6             |
| 52  | 52  | M   | Stomach | adenocarcinoma, well differentiated       | T1bN0M0  | I A   | 152         | 6             |
| 53  | 40  | M   | Stomach | signet ring cell carcinoma                | T1bN1M0  | I B   | 153         | 6             |
| 54  | 34  | F   | Stomach | signet ring cell carcinoma                | T1aN1M0  | I B   | 154         | 6             |
| 55  | 60  | M   | Stomach | adenocarcinoma, well differentiated       | T1bN0M0  | I A   | 155         | 6             |
| 56  | 68  | M   | Stomach | adenocarcinoma, well differentiated       | T1bN1M0  | I B   | 156         | 6             |
| 57  | 52  | M   | Stomach | adenocarcinoma, well differentiated       | T2N0M0   | I B   | 157         | 6             |
| 58  | 62  | M   | Stomach | signet ring cell carcinoma                | T1aN0M0  | I A   | 158         | 6             |
| 59  | 60  | M   | Stomach | adenocarcinoma, well differentiated       | T2N0M0   | I B   | 159         | 6             |
| 60  | .   | .   | Carbon  | .                                         | .        | .     | .           | .             |

# The normal tissue in CQ2 array of this column is from the identical patient.

TNM and Stage: AJCC Cancer Staging Manual (7th Edition)

\*\* Tissue type: see General information sheet

Supplementary data sheet contains Lauren, survival data (available by web)

### CQ2 Supplementary data

| No. | Lauren* | Follow-up months | Follow-up result | Cause of death        | Remark |
|-----|---------|------------------|------------------|-----------------------|--------|
| 1   | D       | 4                | dead             | cancer                | .      |
| 2   | D       | 132              | alive            | .                     | .      |
| 3   | I       | 7                | dead             | cancer                | .      |
| 4   | D       | 132              | alive            | .                     | .      |
| 5   | D       | 100              | dead             | chronic renal failure | .      |
| 6   | D       | 16               | dead             | cancer                | .      |
| 7   | I       | 13               | dead             | cancer                | .      |
| 8   | D       | 1                | dead             | liver cirrhosis       | .      |
| 9   | I       | 123              | dead             | pneumonia             | .      |
| 10  | D       | 131              | alive            | .                     | .      |
| 11  | I       | 9                | dead             | cancer                | .      |
| 12  | I       | 45               | dead             | cancer                | .      |
| 13  | D       | 26               | dead             | cancer                | .      |
| 14  | I       | 131              | alive            | .                     | .      |
| 15  | D       | 6                | dead             | cancer                | .      |
| 16  | D       | 6                | dead             | cancer                | .      |
| 17  | D       | 131              | alive            | .                     | .      |
| 18  | D       | 131              | alive            | .                     | .      |
| 19  | D       | 36               | dead             | cancer                | .      |
| 20  | D       | 41               | dead             | cancer                | .      |
| 21  | D       | 4                | dead             | cancer                | .      |
| 22  | I       | 83               | alive            | .                     | .      |
| 23  | D       | 7                | dead             | cancer                | .      |
| 24  | D       | 36               | dead             | cancer                | .      |
| 25  | D       | 10               | dead             | cancer                | .      |
| 26  | D       | 15               | dead             | cancer                | .      |
| 27  | I       | 130              | alive            | .                     | .      |
| 28  | I       | 101              | dead             | cancer                | .      |
| 29  | D       | 130              | alive            | .                     | .      |
| 30  | .       | 14               | dead             | cancer                | .      |
| 31  | I       | 10               | dead             | cancer                | .      |
| 32  | I       | 15               | dead             | cancer                | .      |
| 33  | D       | 130              | alive            | .                     | .      |
| 34  | D       | 7                | dead             | cancer                | .      |
| 35  | I       | 130              | alive            | .                     | .      |
| 36  | D       | 68               | dead             | cancer                | .      |
| 37  | D       | 129              | alive            | .                     | .      |
| 38  | I       | 2                | dead             | cancer                | .      |
| 39  | D       | 5                | dead             | cancer                | .      |
| 40  | D       | 6                | dead             | cancer                | .      |
| 41  | D       | 81               | dead             | cancer                | .      |
| 42  | I       | 11               | dead             | cancer                | .      |
| 43  | D       | 132              | alive            | .                     | .      |
| 44  | I       | 132              | alive            | .                     | .      |
| 45  | I       | 132              | alive            | .                     | .      |
| 46  | D       | 131              | alive            | .                     | .      |
| 47  | I       | 131              | alive            | .                     | .      |
| 48  | I       | 3                | dead             | chronic renal failure | .      |
| 49  | D       | 130              | alive            | .                     | .      |
| 50  | I       | 130              | alive            | .                     | .      |
| 51  | I       | 130              | alive            | .                     | .      |
| 52  | I       | 130              | alive            | .                     | .      |
| 53  | D       | 130              | alive            | .                     | .      |
| 54  | D       | 130              | alive            | .                     | .      |
| 55  | I       | 130              | alive            | .                     | .      |
| 56  | I       | 129              | alive            | .                     | .      |
| 57  | I       | 129              | alive            | .                     | .      |
| 58  | D       | 129              | alive            | .                     | .      |
| 59  | I       | 99               | dead             | cancer                | .      |
| 60  | .       | .                | .                | .                     | .      |

\* Lauren classification: D, diffuse; I, intestinal



# Patients information of Ovary cancer tissue microarray

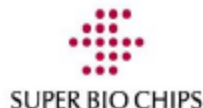

118-88 Yongdu-dong, Seoul 130-820, Korea  
Tel +82 2 3676 8270 Fax +82 2 3676 8269  
www.tissue-array.com info@tissue-array.com

## CJ2 Human, Ovary cancer

| No. | Age | Sex | Organ  | Diagnosis                                                   | pTNM    | Stage | Tissue type* |
|-----|-----|-----|--------|-------------------------------------------------------------|---------|-------|--------------|
| 1   | 65  | F   | Ovary  | serous papillary cystadenoma of borderline malignancy       | T1aNOM0 | I A   | 5            |
| 2   | 26  | F   | Ovary  | mucinous cystadenoma of borderline malignancy               | T1aNOM0 | I A   | 5            |
| 3   | 35  | F   | Ovary  | serous papillary cystadenoma of borderline malignancy       | T1aNOM0 | I A   | 5            |
| 4   | 65  | F   | Ovary  | serous cystadenocarcinoma                                   | T2bNOM0 | II B  | 6            |
| 5   | 48  | F   | Ovary  | endometrioid carcinoma                                      | T2bNOM0 | II B  | 6            |
| 6   | 44  | F   | Ovary  | granulosa cell tumor                                        | T1aNOM0 | I A   | 5            |
| 7   | 49  | F   | Ovary  | endometrioid carcinoma                                      | T2bNOM0 | II B  | 6            |
| 8   | 67  | F   | Ovary  | mucinous cystadenoma of borderline malignancy               | T2bNOM0 | II B  | 5            |
| 9   | 75  | F   | Ovary  | serous cystadenofibroma                                     | T1aNOM0 | I A   | 4            |
| 10  | 50  | F   | Ovary  | papillary serous cystadenocarcinoma , poorly differentiated | T2cNOM0 | II C  | 6            |
| 11  | 44  | F   | Ovary  | fibroma                                                     | T1aNOM0 | I A   | 4            |
| 12  | 50  | F   | Ovary  | papillary serous cystadenocarcinoma                         | T3cNOM1 | IV    | 6            |
| 13  | 47  | F   | Ovary  | endometrioid carcinoma                                      | T3cNOM1 | IV    | 6            |
| 14  | 38  | F   | Ovary  | mixed Brenner tumor and mucinous cystadenoma                | T1aNOM0 | I A   | 4            |
| 15  | 58  | F   | Ovary  | papillary serous cystadenocarcinoma                         | T2bNOM0 | II B  | 6            |
| 16  | 70  | F   | Ovary  | papillary serous cystadenocarcinoma                         | T3bNOM0 | III B | 6            |
| 17  | 65  | F   | Ovary  | struma ovarii                                               | T1aNOM0 | I A   | 4            |
| 18  | 79  | F   | Ovary  | endometrioid adenoacanthofibroma                            | T1aNOM0 | I A   | 4            |
| 19  | 57  | F   | Ovary  | serous surface papillary carcinoma                          | T2bNOM0 | II B  | 6            |
| 20  | 43  | F   | Ovary  | papillary serous cystadenocarcinoma                         | T3bNOM0 | III B | 6            |
| 21  | 68  | F   | Ovary  | undifferentiated carcinoma                                  | T1bNOM0 | I B   | 6            |
| 22  | 50  | F   | Ovary  | clear cell carcinoma                                        | T1aNOM0 | I A   | 6            |
| 23  | 23  | F   | Ovary  | dysgerminoma                                                | T2bNOM0 | II B  | 6            |
| 24  | 51  | F   | Ovary  | common epithelial carcinoma , poorly differentiated         | T2bNOM0 | II B  | 6            |
| 25  | 70  | F   | Ovary  | malignant muellerian mixed tumor                            | T1aNOM0 | I A   | 6            |
| 26  | 21  | F   | Ovary  | dysgerminoma                                                | T1aNOM0 | I A   | 6            |
| 27  | 34  | F   | Ovary  | fibrothecoma                                                | T1aNOM0 | I A   | 4            |
| 28  | 61  | F   | Ovary  | papillary serous cystadenocarcinoma                         | T3bNOM0 | III B | 6            |
| 29  | 54  | F   | Ovary  | sertoli-leydig cell tumor                                   | T1bNOM0 | I B   | 4            |
| 30  | 53  | F   | Ovary  | fibrothecoma                                                | T1aNOM0 | I A   | 4            |
| 31  | 54  | F   | Ovary  | fibrothecoma                                                | T1aNOM0 | I A   | 4            |
| 32  | 34  | F   | Ovary  | papillary serous cystadenocarcinoma                         | T2bNOM0 | II B  | 6            |
| 33  | 31  | F   | Ovary  | dysgerminoma                                                | T2cNOM0 | II C  | 6            |
| 34  | 51  | F   | Ovary  | papillary serous cystadenocarcinoma                         | T2bN1M0 | III C | 6            |
| 35  | 61  | F   | Ovary  | granulosa-theca cell tumor                                  | T1aNOM0 | I A   | 5            |
| 36  | 24  | F   | Ovary  | sertoli-leydig cell tumor                                   | T1aNOM0 | I A   | 4            |
| 37  | 27  | F   | Ovary  | sclerosing stromal tumor                                    | T1aNOM0 | I A   | 5            |
| 38  | 41  | F   | Ovary  | clear cell carcinoma                                        | T2bNOM0 | II B  | 6            |
| 39  | 56  | F   | Ovary  | malignant muellerian mixed tumor                            | T1aNOM0 | I A   | 6            |
| 40  | 41  | F   | Ovary  | clear cell carcinoma                                        | T1aNOM0 | I A   | 6            |
| 41  | 27  | F   | Ovary  | embryonal carcinoma                                         | T2aNOM0 | II A  | 6            |
| 42  | 55  | F   | Ovary  | granulosa cell tumor                                        | T1aNOM0 | I A   | 5            |
| 43  | 23  | F   | Ovary  | dysgerminoma                                                | T1aNOM0 | I A   | 6            |
| 44  | 64  | F   | Ovary  | papillary serous cystadenocarcinoma                         | T2cN1M0 | III C | 5            |
| 45  | 43  | F   | Ovary  | metastatic adenocarcinoma (most likely from breast)         | M1      | IV    | 6            |
| 46  | 48  | F   | Ovary  | malignant lymphoma                                          | -       | II    | 6            |
| 47  | 50  | F   | Ovary  | adenocarcinoma from salpinx                                 | T2bNOM0 | II B  | 6            |
| 48  | 25  | F   | Ovary  | fibrothecoma                                                | T1aNOM0 | I A   | 4            |
| 49  | 46  | F   | Ovary  | metastatic undifferentiated carcinoma                       | M1      | IV    | 6            |
| 50  | 37  | F   | Ovary  | metastatic signet ring carcinoma from stomach               | M1      | IV    | 6            |
| 51  | 55  | F   | Ovary  | serous cystadenocarcinoma, moderately differentiated        | T3bNOM0 | III B | 6            |
| 52  | 55  | F   | Ovary  | fibrothecoma                                                | T1aNOM0 | I A   | 4            |
| 53  | 45  | F   | Ovary  | serous cystadenocarcinoma, moderately differentiated        | T2cNOM0 | II C  | 6            |
| 54  | 37  | F   | Ovary  | endometrioid carcinoma                                      | T2bNOM0 | II B  | 6            |
| 55  | 58  | F   | Ovary  | fibrothecoma                                                | T1aNOM0 | I A   | 4            |
| 56  | 65  | F   | Ovary  | adenocarcinoma, poorly differentiated                       | T3cNOM0 | III C | 6            |
| 57  | 39  | F   | Ovary  | clear cell carcinoma                                        | T2cN1M0 | III C | 6            |
| 58  | 70  | F   | Ovary  | fibroma                                                     | T1aNOM0 | I A   | 4            |
| 59  | 58  | F   | Ovary  | clear cell carcinoma                                        | T1aNOM0 | I A   | 6            |
| 60  | -   | -   | Carbon | -                                                           | -       | -     | -            |

TNM and Stage: AJCC Cancer Staging Manual (7th Edition)

Tissue type\*: see General information sheet

Supplementary data sheet contains survival data (available by web)

### CJ2 Supplementary data

| No. | SNOMED | Follow-up months | Follow-up result | Cause of death      | Remark |
|-----|--------|------------------|------------------|---------------------|--------|
| 1   | M84601 | 0                | lost             | .                   | .      |
| 2   | M84701 | 0                | lost             | .                   | .      |
| 3   | M84601 | 0                | lost             | .                   | .      |
| 4   | M84603 | 125              | dead             | cancer              | .      |
| 5   | M83803 | 0                | lost             | .                   | .      |
| 6   | M86201 | 187              | alive            | .                   | .      |
| 7   | M83803 | 72               | dead             | cancer              | .      |
| 8   | M84701 | 160              | dead             | fracture of femur   | .      |
| 9   | M90140 | 78               | dead             | cancer              | .      |
| 10  | M84603 | 5                | lost             | .                   | .      |
| 11  | M88100 | 183              | alive            | .                   | .      |
| 12  | M84603 | 153              | dead             | cancer              | .      |
| 13  | M83803 | 83               | dead             | cancer              | .      |
| 14  | M90000 | 2                | lost             | .                   | .      |
| 15  | M84603 | 42               | dead             | cancer              | .      |
| 16  | M84603 | 26               | dead             | unknown             | .      |
| 17  | M90900 | 180              | alive            | .                   | .      |
| 18  | M83810 | 156              | dead             | unknown             | .      |
| 19  | M84613 | 16               | lost             | .                   | .      |
| 20  | M84603 | 48               | dead             | cancer              | .      |
| 21  | M80203 | 164              | dead             | cerebral infarction | .      |
| 22  | M83103 | 30               | dead             | cancer              | .      |
| 23  | M90603 | 6                | lost             | .                   | .      |
| 24  | M80203 | 174              | alive            | .                   | .      |
| 25  | M89503 | 174              | alive            | .                   | .      |
| 26  | M90603 | 174              | alive            | .                   | .      |
| 27  | M86000 | 173              | alive            | .                   | .      |
| 28  | M84603 | 172              | alive            | .                   | .      |
| 29  | M86310 | 82               | dead             | cancer              | .      |
| 30  | M86000 | 172              | alive            | .                   | .      |
| 31  | M86000 | 170              | alive            | .                   | .      |
| 32  | M84603 | 21               | dead             | cancer              | .      |
| 33  | M90603 | 0                | lost             | .                   | .      |
| 34  | M84603 | 5                | lost             | .                   | .      |
| 35  | M86211 | 136              | dead             | cancer              | .      |
| 36  | M86310 | 0                | lost             | .                   | .      |
| 37  | M85901 | 0                | lost             | .                   | .      |
| 38  | M83103 | 161              | alive            | .                   | .      |
| 39  | M89503 | 18               | dead             | cancer              | .      |
| 40  | M83103 | 159              | alive            | .                   | .      |
| 41  | M90703 | 14               | dead             | cancer              | .      |
| 42  | M86201 | 157              | alive            | .                   | .      |
| 43  | M90603 | 150              | alive            | .                   | .      |
| 44  | M84601 | 34               | dead             | cancer              | .      |
| 45  | M81406 | 141              | alive            | .                   | .      |
| 46  | M95903 | 133              | alive            | .                   | .      |
| 47  | M81406 | 136              | alive            | .                   | .      |
| 48  | M86000 | 135              | alive            | .                   | .      |
| 49  | M80206 | 135              | alive            | .                   | .      |
| 50  | M84906 | 134              | alive            | .                   | .      |
| 51  | M84603 | 45               | dead             | cancer              | .      |
| 52  | M86000 | 48               | alive            | .                   | .      |
| 53  | M84603 | 47               | alive            | .                   | .      |
| 54  | M83803 | 47               | alive            | .                   | .      |
| 55  | M86000 | 45               | alive            | .                   | .      |
| 56  | M80203 | 45               | alive            | .                   | .      |
| 57  | M83103 | 45               | alive            | .                   | .      |
| 58  | M88100 | 45               | alive            | .                   | .      |
| 59  | M83103 | 44               | alive            | .                   | .      |
| 60  | .      | .                | .                | .                   | .      |



# Patients information of kidney cancer tissue microarray

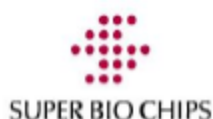

118-88 Yongdu-dong, Seoul 130-820, Korea  
 Tel +82 2 3676 8270 Fax +82 2 3676 8269  
 www.tissue-array.com info@tissue-array.com

## CL2 Human, Kidney cancer

| No. | Age | Sex | Organ  | Diagnosis                                                   | TNM       | Tissue type <sup>†</sup> |
|-----|-----|-----|--------|-------------------------------------------------------------|-----------|--------------------------|
| 1   | 52  | F   | Kidney | renal cell carcinoma, granular cell type                    | T2bNXOM0  | 6                        |
| 2   | 60  | F   | Kidney | renal cell carcinoma, clear cell type                       | T3aNOM1*  | 6                        |
| 3   | 42  | M   | Kidney | renal cell carcinoma, clear cell type                       | T3aNOM0   | 6                        |
| 4   | 59  | M   | Kidney | renal cell carcinoma, clear cell type                       | T2aNOM0   | 6                        |
| 5   | 67  | F   | Kidney | renal cell carcinoma, clear cell and granular cell type     | T2aNXXM0  | 6                        |
| 6   | 65  | M   | Kidney | renal cell carcinoma, clear cell and granular cell type     | T2bNXOM0  | 6                        |
| 7   | 59  | M   | Kidney | renal cell carcinoma, clear cell and granular cell type     | T1bNXOM0  | 6                        |
| 8   | 56  | M   | Kidney | renal cell carcinoma, clear cell and pseudosarcomatous type | T1bNOM1*  | 6                        |
| 9   | 42  | F   | Kidney | renal cell carcinoma, clear cell type                       | T3aNXXM0  | 6                        |
| 10  | 50  | M   | Kidney | renal cell carcinoma, clear cell type                       | T1aNOM0   | 6                        |
| 11  | 52  | M   | Kidney | renal cell carcinoma, clear cell type                       | T1aNOM0   | 6                        |
| 12  | 68  | F   | Kidney | renal cell carcinoma, clear cell type                       | T3aNOM0   | 6                        |
| 13  | 60  | F   | Kidney | renal cell carcinoma, clear cell type                       | T3aNOM0   | 6                        |
| 14  | 69  | F   | Kidney | renal cell carcinoma, clear cell type                       | T2aNXXM0  | 6                        |
| 15  | 54  | M   | Kidney | renal cell carcinoma, clear cell type                       | T1bNXOM0  | 6                        |
| 16  | 43  | F   | Kidney | renal cell carcinoma, clear cell type                       | T1aNOM0   | 6                        |
| 17  | 53  | M   | Kidney | renal cell carcinoma, clear cell type                       | T3aNOM1** | 6                        |
| 18  | 59  | M   | Kidney | renal cell carcinoma, clear cell type                       | T3aNOM0   | 6                        |
| 19  | 61  | M   | Kidney | renal cell carcinoma, collecting duct type                  | T1aNXXM0  | 6                        |
| 20  | 40  | M   | Kidney | renal cell carcinoma, clear cell type                       | T1aNXXM0  | 6                        |
| 21  | 52  | M   | Kidney | renal cell carcinoma, clear cell type                       | T1bNOM0   | 6                        |
| 22  | 63  | F   | Kidney | renal cell carcinoma, clear cell and granular cell type     | T2aNOM0   | 6                        |
| 23  | 64  | M   | Kidney | renal cell carcinoma, clear cell type                       | T1bNOM0   | 6                        |
| 24  | 37  | M   | Kidney | renal cell carcinoma, collecting duct type                  | T2bNOM0   | 6                        |
| 25  | 65  | M   | Kidney | renal cell carcinoma, papillary type                        | T1bNXOM0  | 6                        |
| 26  | 74  | M   | Kidney | renal cell carcinoma, clear cell type                       | T3aNOM0   | 6                        |
| 27  | 67  | M   | Kidney | renal cell carcinoma, clear cell type                       | T4NXOM0   | 6                        |
| 28  | 50  | M   | Kidney | renal cell carcinoma                                        | T2aNOM0   | 6                        |
| 29  | 74  | M   | Kidney | renal cell carcinoma, clear cell type                       | T3aNOM0   | 6                        |
| 30  | 62  | M   | Kidney | renal cell carcinoma, clear cell and granular cell type     | T3aNOM0   | 6                        |
| 31  | 64  | M   | Kidney | renal cell carcinoma, papillary type                        | T1aNXXM0  | 6                        |
| 32  | 45  | M   | Kidney | renal cell carcinoma, clear cell type                       | T1bNOM0   | 6                        |
| 33  | 62  | M   | Kidney | renal cell carcinoma                                        | T3aN1M0   | 6                        |
| 34  | 53  | M   | Kidney | renal cell carcinoma, clear cell type                       | T1bNXOM0  | 6                        |
| 35  | 64  | M   | Kidney | renal cell carcinoma, clear cell type                       | T1bNXOM0  | 6                        |
| 36  | 72  | M   | Kidney | renal cell carcinoma, clear cell type                       | T1aNXXM0  | 6                        |
| 37  | 62  | F   | Kidney | renal cell carcinoma, clear cell type                       | T3aNOM0   | 6                        |
| 38  | 56  | M   | Kidney | renal cell carcinoma, clear cell type                       | T3aNOM0   | 6                        |
| 39  | 58  | M   | Kidney | renal cell carcinoma                                        | T2aNOM0   | 6                        |
| 40  | 57  | M   | Kidney | renal cell carcinoma, clear cell and granular cell type     | T3bNOM0   | 6                        |
| 41  | 64  | F   | Kidney | transitional cell carcinoma, pelvis                         | .         | 6                        |
| 42  | 43  | F   | Kidney | renal cell carcinoma, clear cell type                       | T1bNOM0   | 6                        |
| 43  | 52  | F   | Kidney | renal cell carcinoma, granular cell type                    | T1bNOM0   | 6                        |
| 44  | 64  | M   | Kidney | renal cell carcinoma, granular cell type                    | T3aNOM0   | 6                        |
| 45  | 57  | M   | Kidney | renal cell carcinoma, clear cell type                       | T1bNOM0   | 6                        |
| 46  | 59  | M   | Kidney | renal cell carcinoma, clear cell and granular cell type     | T2aNXXM0  | 6                        |
| 47  | 47  | M   | Kidney | renal cell carcinoma, clear cell type                       | T1aNXXM0  | 6                        |
| 48  | 77  | M   | Kidney | renal cell carcinoma, clear cell type                       | T1aNOM0   | 6                        |
| 49  | 47  | F   | Kidney | renal cell carcinoma, clear cell and granular cell type     | T2aNXXM0  | 6                        |
| 50  | 55  | F   | Kidney | renal cell carcinoma, clear cell type                       | T3aNOM0   | 6                        |
| 51  | 59  | M   | Kidney | Normal of No. 4                                             | .         | 3                        |
| 52  | 43  | F   | Kidney | Normal of No. 16                                            | .         | 3                        |
| 53  | 40  | M   | Kidney | Normal of No. 20                                            | .         | 3                        |
| 54  | 52  | M   | Kidney | Normal of No. 21                                            | .         | 3                        |
| 55  | 62  | M   | Kidney | Normal of No. 30                                            | .         | 3                        |
| 56  | 72  | M   | Kidney | Normal of No. 36                                            | .         | 3                        |
| 57  | 43  | F   | Kidney | Normal of No. 42                                            | .         | 3                        |
| 58  | 77  | M   | Kidney | Normal of No. 48                                            | .         | 3                        |
| 59  | 55  | F   | Kidney | Normal of No. 50                                            | .         | 3                        |
| 60  | .   | .   | Carbon | .                                                           | .         | .                        |

#2 \*: lung metastasis

#8 \*: metastasis to contralateral kidney

#17 \*: perinephric fat involvement, \*\*: bone metastasis

TNM and Stage: AJCC Cancer Staging Manual (7th Edition)

Tissue type<sup>†</sup>: see General information sheet

Supplementary data sheet contains tumor size, capsule involvement, vein involvement and survival data (available by web)





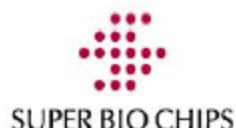

118-88 Yongdu-dong, Seoul 130-820, Korea  
 Tel +82 2 3676 8270 Fax +82 2 3676 8269  
 www.tissue-array.com info@tissue-array.com

**CA4 Human, Prostate cancer-normal**

| No. | Age | Sex | Organ    | Diagnosis             | Gleason score | pTNM    | Stage | Tissue type <sup>+</sup> |
|-----|-----|-----|----------|-----------------------|---------------|---------|-------|--------------------------|
| 1   | 60  | M   | Prostate | adenocarcinoma        | 9             | T3bN0M0 | III   | 6                        |
| 2   | 64  | M   | Prostate | adenocarcinoma        | 7             | T2cN0M0 | II B  | 6                        |
| 3   | 71  | M   | Prostate | adenocarcinoma        | 9             | T3bN0M0 | III   | 6                        |
| 4   | 64  | M   | Prostate | adenocarcinoma        | 10            | T3aN0M0 | III   | 6                        |
| 5   | 59  | M   | Prostate | adenocarcinoma        | 9             | T3bN0M0 | III   | 6                        |
| 6   | 65  | M   | Prostate | adenocarcinoma        | 8             | T3bN0M0 | III   | 6                        |
| 7   | 73  | M   | Prostate | adenocarcinoma        | 7             | T2cN0M0 | II B  | 6                        |
| 8   | 69  | M   | Prostate | adenocarcinoma        | 7             | T2cN0M0 | II B  | 6                        |
| 9   | 62  | M   | Prostate | adenocarcinoma        | 7             | T2cN0M0 | II B  | 6                        |
| 10  | 66  | M   | Prostate | adenocarcinoma        | 9             | T3bN0M0 | III   | 6                        |
| 11  | 60  | M   | Prostate | adenocarcinoma        | 9             | T3bN0M0 | III   | 6                        |
| 12  | 66  | M   | Prostate | adenocarcinoma        | 7             | T3aN0M0 | III   | 6                        |
| 13  | 70  | M   | Prostate | adenocarcinoma        | 7             | T3bN0M0 | III   | 6                        |
| 14  | 65  | M   | Prostate | adenocarcinoma        | 9             | T3bN0M0 | III   | 6                        |
| 15  | 67  | M   | Prostate | adenocarcinoma        | 9             | T3bN1M0 | III   | 6                        |
| 16  | 69  | M   | Prostate | adenocarcinoma        | 7             | T3bN0M0 | III   | 6                        |
| 17  | 63  | M   | Prostate | adenocarcinoma        | 9             | T3aN1M0 | III   | 6                        |
| 18  | 69  | M   | Prostate | adenocarcinoma        | 7             | T3aN0M0 | III   | 6                        |
| 19  | 70  | M   | Prostate | adenocarcinoma        | 7             | T3aN0M0 | III   | 6                        |
| 20  | 58  | M   | Prostate | adenocarcinoma        | 9             | T3bN0M0 | III   | 6                        |
| 21  | 58  | M   | Prostate | adenocarcinoma        | 7             | T3bN0M0 | III   | 6                        |
| 22  | 71  | M   | Prostate | adenocarcinoma        | 7             | T2cN0M0 | II B  | 6                        |
| 23  | 70  | M   | Prostate | adenocarcinoma        | 7             | T3bN0M0 | III   | 6                        |
| 24  | 59  | M   | Prostate | adenocarcinoma        | 6             | T2bN0M0 | II A  | 6                        |
| 25  | 63  | M   | Prostate | adenocarcinoma        | 9             | T3bN0M0 | III   | 6                        |
| 26  | 72  | M   | Prostate | adenocarcinoma        | 9             | T3bN0M0 | III   | 6                        |
| 27  | 66  | M   | Prostate | adenocarcinoma        | 8             | T3bN0M0 | III   | 6                        |
| 28  | 70  | M   | Prostate | adenocarcinoma        | 6             | T3bN0M0 | III   | 6                        |
| 29  | 70  | M   | Prostate | adenocarcinoma        | 7             | T2cN0M0 | II B  | 6                        |
| 30  | 68  | M   | Prostate | adenocarcinoma        | 8             | T3bN0M0 | III   | 6                        |
| 31  | 63  | M   | Prostate | adenocarcinoma        | 10            | T3bN0M0 | III   | 6                        |
| 32  | 57  | M   | Prostate | adenocarcinoma        | 7             | T3bN0M0 | III   | 6                        |
| 33  | 72  | M   | Prostate | adenocarcinoma        | 8             | T2cN0M0 | II B  | 6                        |
| 34  | 70  | M   | Prostate | adenocarcinoma        | 8             | T3bN0M0 | III   | 6                        |
| 35  | 75  | M   | Prostate | adenocarcinoma        | 9             | T3bN0M0 | III   | 6                        |
| 36  | 62  | M   | Prostate | adenocarcinoma        | 9             | T3bN0M0 | III   | 6                        |
| 37  | 63  | M   | Prostate | adenocarcinoma        | 9             | T3bN0M0 | III   | 6                        |
| 38  | 53  | M   | Prostate | adenocarcinoma        | 9             | T3bN0M0 | III   | 6                        |
| 39  | 63  | M   | Prostate | adenocarcinoma        | 8             | T3bN0M0 | III   | 6                        |
| 40  | 44  | M   | Prostate | adenocarcinoma        | 7             | T3bN0M0 | III   | 6                        |
| 41  | 69  | M   | Prostate | normal (match of #8)  | .             | .       | .     | 3                        |
| 42  | 62  | M   | Prostate | normal (match of #9)  | .             | .       | .     | 3                        |
| 43  | 66  | M   | Prostate | normal (match of #12) | .             | .       | .     | 3                        |
| 44  | 65  | M   | Prostate | normal (match of #14) | .             | .       | .     | 3                        |
| 45  | 69  | M   | Prostate | normal (match of #18) | .             | .       | .     | 3                        |
| 46  | 70  | M   | Prostate | normal (match of #19) | .             | .       | .     | 3                        |
| 47  | 70  | M   | Prostate | normal (match of #29) | .             | .       | .     | 3                        |
| 48  | 63  | M   | Prostate | normal (match of #31) | .             | .       | .     | 3                        |
| 49  | 44  | M   | Prostate | normal (match of #40) | .             | .       | .     | 3                        |
| 50  | .   | .   | Carbon   | .                     | .             | .       | .     | .                        |

TNM and Stage: AJCC Cancer Staging Manual (7th Edition)

Tissue type<sup>+</sup>: see General information sheet

Supplementary data sheet contains PSA level, residual tumor and survival data (available by web)

### CA4 Supplementary data

| No. | PSA (ng/ml) | Residual tumor | Follow-up months | Follow-up result | Cause of death | Remark |
|-----|-------------|----------------|------------------|------------------|----------------|--------|
| 1   | 11.2        | R0             | 60               | alive            | .              | .      |
| 2   | 30          | R0             | 60               | alive            | .              | .      |
| 3   | 60.4        | R1             | 55               | alive            | .              | .      |
| 4   | 7.4         | R1             | 47               | alive            | .              | .      |
| 5   | 9.8         | R1             | 44               | alive            | .              | .      |
| 6   | 34.9        | R1             | 43               | alive            | .              | .      |
| 7   | 48.1        | R1             | 42               | alive            | .              | .      |
| 8   | 10.6        | R0             | 42               | alive            | .              | .      |
| 9   | 37.3        | R1             | 39               | alive            | .              | .      |
| 10  | 1.2         | R1             | 39               | alive            | .              | .      |
| 11  | 40          | R1             | 39               | alive            | .              | .      |
| 12  | 8.4         | R1             | 39               | alive            | .              | .      |
| 13  | 7           | R1             | 37               | alive            | .              | .      |
| 14  | 17.5        | R1             | 23               | dead             | cancer         | .      |
| 15  | 13.1        | R1             | 34               | alive            | .              | .      |
| 16  | 1.1         | R1             | 33               | alive            | .              | .      |
| 17  | 11.8        | R1             | 33               | alive            | .              | .      |
| 18  | 17.6        | R1             | 27               | alive            | .              | .      |
| 19  | 9           | R1             | 26               | alive            | .              | .      |
| 20  | 5.8         | R0             | 26               | alive            | .              | .      |
| 21  | 15.8        | R1             | 24               | alive            | .              | .      |
| 22  | 31.4        | R1             | 24               | alive            | .              | .      |
| 23  | 14.4        | R1             | 19               | alive            | .              | .      |
| 24  | 18.3        | R0             | 18               | alive            | .              | .      |
| 25  | 16.6        | R1             | 17               | alive            | .              | .      |
| 26  | .           | R1             | 16               | alive            | .              | .      |
| 27  | 10.8        | R1             | 17               | dead             | cancer         | .      |
| 28  | 10.8        | R1             | 16               | alive            | .              | .      |
| 29  | .           | R0             | 15               | alive            | .              | .      |
| 30  | 26.9        | R1             | 15               | alive            | .              | .      |
| 31  | .           | R1             | 15               | alive            | .              | .      |
| 32  | 25          | R1             | 15               | alive            | .              | .      |
| 33  | 16.8        | R1             | 15               | alive            | .              | .      |
| 34  | 0.5         | R1             | 15               | alive            | .              | .      |
| 35  | 98          | R1             | 15               | alive            | .              | .      |
| 36  | .           | R1             | 15               | alive            | .              | .      |
| 37  | 91          | R1             | 14               | alive            | .              | .      |
| 38  | 161         | R1             | 17               | dead             | cancer         | .      |
| 39  | 13          | R1             | 13               | alive            | .              | .      |
| 40  | .           | R1             | 11               | alive            | .              | .      |
| 41  | .           | .              | .                | .                | .              | .      |
| 42  | .           | .              | .                | .                | .              | .      |
| 43  | .           | .              | .                | .                | .              | .      |
| 44  | .           | .              | .                | .                | .              | .      |
| 45  | .           | .              | .                | .                | .              | .      |
| 46  | .           | .              | .                | .                | .              | .      |
| 47  | .           | .              | .                | .                | .              | .      |
| 48  | .           | .              | .                | .                | .              | .      |
| 49  | .           | .              | .                | .                | .              | .      |
| 50  | .           | .              | .                | .                | .              | .      |

\* R0: No residual tumor.

\* R1: Positive resection margin.

### Quality Control Sheet of CA4-D

Although we are doing our best to maintain the quality of every slide, the content of each case varies from slide to slide. Some of the cases may not contain adequate tissue. Please refer to this quality control sheet for evaluation.

#11: a few cancer cells included.



# Patients information of Uterine cervix cancer-metastasis-normal tissue microarray

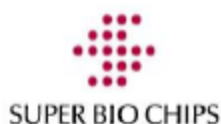

118-88 Yongdu-dong, Seoul 130-820, Korea  
 Tel +82 2 3676 8270 Fax +82 2 3676 8269  
 www.tissue-array.com info@tissue-array.com

## CZA2 Human, Uterine cervix cancer-metastasis-normal

| No. | Age | Sex | Organ      | Diagnosis                              | pTNM     | Stage | Tissue type* |
|-----|-----|-----|------------|----------------------------------------|----------|-------|--------------|
| 1   | 70  | F   | Cervix     | squamous cell carcinoma, microinvasive | T1a1N0M0 | IA1   | 6            |
| 2   | 46  | F   | Cervix     | squamous cell carcinoma, microinvasive | T1a1N0M0 | IA1   | 6            |
| 3   | 42  | F   | Cervix     | squamous cell carcinoma, microinvasive | T1a1N0M0 | IA1   | 6            |
| 4   | 57  | F   | Cervix     | squamous cell carcinoma in situ        | TisN0M0  | 0     | 6            |
| 5   | 33  | F   | Cervix     | squamous cell carcinoma, microinvasive | T1a1N0M0 | IA1   | 6            |
| 6   | 35  | F   | Cervix     | squamous cell carcinoma in situ        | TisN0M0  | 0     | 6            |
| 7   | 48  | F   | Cervix     | squamous cell carcinoma, microinvasive | T1a1N0M0 | IA1   | 6            |
| 8   | 39  | F   | Cervix     | squamous cell carcinoma, microinvasive | T1a1N0M0 | IA1   | 6            |
| 9   | 58  | F   | Cervix     | squamous cell carcinoma, microinvasive | T1a1N0M0 | IA1   | 6            |
| 10  | 53  | F   | Cervix     | squamous cell carcinoma in situ        | TisN0M0  | 0     | 6            |
| 11  | 53  | F   | Cervix     | squamous cell carcinoma                | T1b2N0M0 | IB2   | 6            |
| 12  | 53  | F   | Cervix     | squamous cell carcinoma                | T2bN1M0  | IIIB  | 6            |
| 13  | 50  | F   | Cervix     | adenocarcinoma                         | T1b2N1M0 | IIIB  | 6            |
| 14  | 45  | F   | Cervix     | squamous cell carcinoma                | T1b2N1M0 | IIIB  | 6            |
| 15  | 49  | F   | Cervix     | squamous cell carcinoma                | T1b1N1M0 | IIIB  | 6            |
| 16  | 35  | F   | Cervix     | squamous cell carcinoma                | T1b1N0M0 | IB1   | 6            |
| 17  | 57  | F   | Cervix     | squamous cell carcinoma                | T2a1N0M0 | IIA1  | 6            |
| 18  | 39  | F   | Cervix     | squamous cell carcinoma                | T1b1N0M0 | IB1   | 6            |
| 19  | 66  | F   | Cervix     | squamous cell carcinoma                | T2a1N1M0 | IIIB  | 6            |
| 20  | 55  | F   | Cervix     | squamous cell carcinoma                | T1b2N0M0 | IB2   | 6            |
| 21  | 64  | F   | Cervix     | squamous cell carcinoma                | T1b2N1M0 | IIIB  | 6            |
| 22  | 50  | F   | Cervix     | squamous cell carcinoma                | T1b1N0M0 | IB1   | 6            |
| 23  | 48  | F   | Cervix     | squamous cell carcinoma                | T1b1N1M0 | IIIB  | 6            |
| 24  | 51  | F   | Cervix     | squamous cell carcinoma                | T1b2N1M0 | IIIB  | 6            |
| 25  | 54  | F   | Cervix     | squamous cell carcinoma                | T1b1N0M0 | IB1   | 6            |
| 26  | 39  | F   | Cervix     | squamous cell carcinoma                | T1b1N0M0 | IB1   | 6            |
| 27  | 58  | F   | Cervix     | squamous cell carcinoma                | T1b1N0M0 | IB1   | 6            |
| 28  | 57  | F   | Cervix     | squamous cell carcinoma                | T1b1N0M0 | IB1   | 6            |
| 29  | 55  | F   | Cervix     | squamous cell carcinoma                | T1b1N0M0 | IB1   | 6            |
| 30  | 35  | F   | Cervix     | squamous cell carcinoma                | T1b1N1M0 | IIIB  | 6            |
| 31  | 62  | F   | Cervix     | squamous cell carcinoma                | T1b1N0M0 | IB1   | 6            |
| 32  | 64  | F   | Cervix     | squamous cell carcinoma                | T1b2N1M0 | IIIB  | 6            |
| 33  | 60  | F   | Cervix     | adenosquamous carcinoma                | T1b1N0M0 | IB1   | 6            |
| 34  | 43  | F   | Cervix     | squamous cell carcinoma                | T1b1N1M0 | IIIB  | 6            |
| 35  | 68  | F   | Cervix     | squamous cell carcinoma                | T1b1N0M0 | IB1   | 6            |
| 36  | 45  | F   | Cervix     | squamous cell carcinoma                | T1b2N0M0 | IB2   | 6            |
| 37  | 40  | F   | Cervix     | squamous cell carcinoma                | T1b1N0M0 | IB1   | 6            |
| 38  | 58  | F   | Cervix     | adenosquamous carcinoma                | T1b1N0M0 | IB1   | 6            |
| 39  | 67  | F   | Cervix     | squamous cell carcinoma                | T1b1N0M0 | IB1   | 6            |
| 40  | 48  | F   | Cervix     | squamous cell carcinoma                | T1b1N1M0 | IIIB  | 6            |
| 41  | 62  | F   | Cervix     | squamous cell carcinoma                | T1b2N1M0 | IIIB  | 6            |
| 42  | 32  | F   | Cervix     | squamous cell carcinoma                | T1b1N1M0 | IIIB  | 6            |
| 43  | 55  | F   | Cervix     | squamous cell carcinoma                | T2a1N1M0 | IIIB  | 6            |
| 44  | 61  | F   | Cervix     | squamous cell carcinoma                | T2bN1M0  | IIIB  | 6            |
| 45  | 34  | F   | Cervix     | adenocarcinoma                         | T1b2N1M0 | IIIB  | 6            |
| 46  | 53  | F   | Cervix     | squamous cell carcinoma                | T1b1N0M0 | IB1   | 6            |
| 47  | 45  | F   | Cervix     | squamous cell carcinoma                | T1b1N0M0 | IB1   | 6            |
| 48  | 65  | F   | Cervix     | squamous cell carcinoma                | T1b1N0M0 | IB1   | 6            |
| 49  | 47  | F   | Cervix     | squamous cell carcinoma                | T1b1N1M0 | IIIB  | 6            |
| 50  | 59  | F   | Cervix     | adenosquamous carcinoma                | T1b2N1M0 | IIIB  | 6            |
| 51  | 62  | F   | Lymph node | metastatic carcinoma of No.41          | .        | .     | 6            |
| 52  | 32  | F   | Lymph node | metastatic carcinoma of No.42          | .        | .     | 6            |
| 53  | 55  | F   | Lymph node | metastatic carcinoma of No.43          | .        | .     | 6            |
| 54  | 61  | F   | Lymph node | metastatic carcinoma of No.44          | .        | .     | 6            |
| 55  | 34  | F   | Lymph node | metastatic carcinoma of No.45          | .        | .     | 6            |
| 56  | 53  | F   | Cervix     | normal of No.46                        | .        | .     | 3            |
| 57  | 45  | F   | Cervix     | normal of No.47                        | .        | .     | 3            |
| 58  | 65  | F   | Cervix     | normal of No.48                        | .        | .     | 3            |
| 59  | 47  | F   | Cervix     | normal of No.49                        | .        | .     | 3            |
| 60  | .   | .   | Carbon     | .                                      | .        | .     | .            |

TNM and Stage: AJCC Cancer Staging Manual (7th Edition)

Tissue type\*: see General information sheet

Supplementary data sheet contains survival data (available by web)

# Patients information of Esophagus cancer tissue microarray

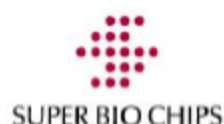

118-88 Yongdu-dong, Seoul 130-820, Korea  
 Tel +82 2 3676 8270 Fax +82 2 3676 8269  
 www.tissue-array.com info@tissue-array.com

## CR2 Human, Esophagus cancer

| No. | Age | Sex | Organ     | Diagnosis                                               | pTNM    | Stage | Tissue type <sup>*</sup> |
|-----|-----|-----|-----------|---------------------------------------------------------|---------|-------|--------------------------|
| 1   | 58  | M   | Esophagus | basaloid carcinoma                                      | T3N0M0  | II B  | 6                        |
| 2   | 54  | M   | Esophagus | squamous cell carcinoma, moderately differentiated      | T2N3M0  | III C | 6                        |
| 3   | 57  | M   | Esophagus | squamous cell carcinoma, poorly differentiated          | T3N2M0  | III B | 6                        |
| 4   | 75  | M   | Esophagus | squamous cell carcinoma                                 | T3N1M0  | III A | 6                        |
| 5   | 46  | M   | Esophagus | squamous cell carcinoma, well differentiated            | T3N1M0  | III A | 6                        |
| 6   | 58  | M   | Esophagus | squamous cell carcinoma, moderately differentiated      | T3N2M0  | III B | 6                        |
| 7   | 70  | M   | Esophagus | squamous cell carcinoma, moderately differentiated      | T3N2M0  | III B | 6                        |
| 8   | 66  | M   | Esophagus | squamous cell carcinoma, moderately differentiated      | T3N0M0  | II B  | 6                        |
| 9   | 53  | M   | Esophagus | small cell carcinoma                                    | T2N2M0  | III A | 6                        |
| 10  | 67  | M   | Esophagus | squamous cell carcinoma, well differentiated            | T3N0M0  | II A  | 6                        |
| 11  | 60  | F   | Esophagus | squamous cell carcinoma, well differentiated            | T3N0M0  | I B   | 6                        |
| 12  | 69  | M   | Esophagus | squamous cell carcinoma, well differentiated            | T3N0M0  | II A  | 6                        |
| 13  | 62  | M   | Esophagus | squamous cell carcinoma, moderately differentiated      | T3N0M0  | II B  | 6                        |
| 14  | 57  | M   | Esophagus | squamous cell carcinoma, well differentiated            | T3N1M0  | III A | 6                        |
| 15  | 62  | M   | Esophagus | squamous cell carcinoma, well differentiated            | T3N0M0  | II A  | 6                        |
| 16  | 36  | F   | Esophagus | adenocarcinoma, well differentiated                     | T1bN0M0 | I A   | 6                        |
| 17  | 60  | M   | Esophagus | squamous cell carcinoma, well differentiated            | T3N0M0  | I B   | 6                        |
| 18  | 50  | M   | Esophagus | squamous cell carcinoma, moderately differentiated      | T3N0M0  | II A  | 6                        |
| 19  | 60  | F   | Esophagus | squamous cell carcinoma, moderately differentiated      | T3N1M0  | III A | 6                        |
| 20  | 57  | M   | Esophagus | squamous cell carcinoma, moderately differentiated      | T3N2M0  | III B | 6                        |
| 21  | 58  | M   | Esophagus | squamous cell carcinoma, well differentiated            | T3N2M0  | III B | 6                        |
| 22  | 74  | M   | Esophagus | squamous cell carcinoma, moderately differentiated      | T3N0M0  | II B  | 6                        |
| 23  | 56  | F   | Esophagus | squamous cell carcinoma, poorly differentiated          | T3N2M0  | III B | 6                        |
| 24  | 43  | M   | Esophagus | squamous cell carcinoma, well differentiated            | T3N1M0  | III A | 6                        |
| 25  | 69  | M   | Esophagus | squamous cell carcinoma, moderately differentiated      | T3N2M0  | III B | 6                        |
| 26  | 58  | M   | Esophagus | squamous cell carcinoma, poorly differentiated          | T3N1M0  | III A | 6                        |
| 27  | 62  | M   | Esophagus | squamous cell carcinoma, well differentiated            | T4aN0M0 | III A | 6                        |
| 28  | 63  | M   | Esophagus | adenosquamous carcinoma                                 | T3N1M0  | III A | 6                        |
| 29  | 56  | M   | Esophagus | squamous cell carcinoma, well differentiated            | T4aN2M0 | III C | 6                        |
| 30  | 59  | M   | Esophagus | squamous cell carcinoma, moderately differentiated      | T3N1M0  | III A | 6                        |
| 31  | 50  | M   | Esophagus | squamous cell carcinoma, well differentiated            | T3N1M0  | III A | 6                        |
| 32  | 52  | M   | Esophagus | squamous cell carcinoma, well differentiated            | T2N2M0  | III A | 6                        |
| 33  | 58  | M   | Esophagus | squamous cell carcinoma, moderately differentiated      | T3N3M0  | III C | 6                        |
| 34  | 64  | F   | Esophagus | squamous cell carcinoma, moderately differentiated      | T3N1M0  | III A | 6                        |
| 35  | 60  | M   | Esophagus | squamous cell carcinoma, moderately differentiated      | T3N1M0  | III A | 6                        |
| 36  | 64  | M   | Esophagus | squamous cell carcinoma, well differentiated            | T3N1M0  | III A | 6                        |
| 37  | 52  | M   | Esophagus | squamous cell carcinoma, well differentiated            | T3N2M0  | III B | 6                        |
| 38  | 45  | M   | Esophagus | adenosquamous carcinoma                                 | T3N0M0  | I B   | 6                        |
| 39  | 46  | M   | Esophagus | squamous cell carcinoma, well differentiated            | T3N0M0  | I B   | 6                        |
| 40  | 66  | M   | Esophagus | squamous cell carcinoma, moderately differentiated      | T3N0M0  | II B  | 6                        |
| 41  | 69  | M   | Esophagus | squamous cell carcinoma, moderately differentiated      | T3N1M0  | III A | 6                        |
| 42  | 60  | M   | Esophagus | squamous cell carcinoma, well differentiated            | T3N2M0  | III B | 6                        |
| 43  | 62  | M   | Esophagus | squamous cell carcinoma, well differentiated            | T3N1M1  | IV    | 6                        |
| 44  | 52  | M   | Esophagus | squamous cell carcinoma, poorly differentiated          | T3N1M0  | III A | 6                        |
| 45  | 59  | M   | Esophagus | squamous cell carcinoma, moderately differentiated      | T3N0M0  | II A  | 6                        |
| 46  | 67  | M   | Esophagus | squamous cell carcinoma, moderately differentiated      | T3N1M0  | III A | 6                        |
| 47  | 65  | M   | Esophagus | adenosquamous cell carcinoma                            | T4aN0M0 | III A | 6                        |
| 48  | 51  | M   | Esophagus | adenosquamous cell carcinoma, moderately differentiated | T3N0M0  | II B  | 6                        |
| 49  | 47  | M   | Esophagus | squamous cell carcinoma, well differentiated            | T3N2M0  | III B | 6                        |
| 50  | 42  | M   | Esophagus | squamous cell carcinoma, moderately differentiated      | T3N3M1  | IV    | 6                        |
| 51  | 66  | M   | Esophagus | squamous cell carcinoma, poorly differentiated          | T3N1M0  | III A | 6                        |
| 52  | 53  | M   | Esophagus | adenocarcinoma, moderately differentiated               | T3N2M0  | III B | 6                        |
| 53  | 59  | M   | Esophagus | squamous cell carcinoma, well differentiated            | T3N2M0  | III B | 6                        |
| 54  | 59  | M   | Esophagus | squamous cell carcinoma, moderately differentiated      | T3N1M0  | III A | 6                        |
| 55  | 50  | M   | Esophagus | squamous cell carcinoma, moderately differentiated      | T3N1M0  | III A | 6                        |
| 56  | 42  | M   | Esophagus | squamous cell carcinoma, moderately differentiated      | T3N0M0  | II A  | 6                        |
| 57  | 69  | M   | Esophagus | adenocarcinoma, poorly differentiated                   | T3N3M0  | III C | 6                        |
| 58  | 54  | M   | Esophagus | squamous cell carcinoma, moderately differentiated      | T3N0M0  | II A  | 6                        |
| 59  | 70  | M   | Esophagus | squamous cell carcinoma, moderately differentiated      | T2N1M0  | II B  | 6                        |
| 60  | 68  | M   | Esophagus | squamous cell carcinoma, well differentiated            | T3N2M0  | III B | 6                        |

TNM and Stage: AJCC Cancer Staging Manual (7th Edition)

Tissue type<sup>\*</sup>: see General information sheet

Supplementary data sheet contains survival data (available by web)



# Patients information of Osteosarcoma tissue microarray

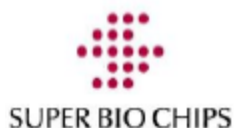

118-88 Yongdu-dong, Seoul 130-820, Korea  
 Tel +82 2 3676 8270 Fax +82 2 3676 8269  
 www.tissue-array.com info@tissue-array.com

## CV2 Human, Osteosarcoma

| No. | Age | Sex | Organ                        | Diagnosis                                    | Tissue type |
|-----|-----|-----|------------------------------|----------------------------------------------|-------------|
| 1   | 24  | M   | Bone, femur                  | osteosarcoma, osteoblastic type              | 6           |
| 2   | 17  | F   | Bone, femur                  | osteosarcoma                                 | 6           |
| 3   | 16  | M   | Bone, femur                  | osteosarcoma                                 | 6           |
| 4   | 23  | M   | Bone                         | osteosarcoma                                 | 6           |
| 5   | 14  | F   | Bone, femur                  | osteosarcoma                                 | 6           |
| 6   | 37  | M   | Bone, pelvis                 | osteosarcoma                                 | 6           |
| 7   | 17  | M   | Bone, pelvis                 | osteosarcoma, chondroblastic type            | 6           |
| 8   | 20  | M   | Bone, femur                  | osteosarcoma, chondroblastic type            | 6           |
| 9   | 20  | M   | Bone, ilium                  | osteosarcoma, chondroblastic type            | 6           |
| 10  | 18  | M   | Bone, femur                  | osteosarcoma, chondroblastic type            | 6           |
| 11  | 17  | M   | Bone, tibia                  | osteosarcoma, osteoblastic type              | 6           |
| 12  | 20  | M   | Knee                         | osteosarcoma, osteoblastic type              | 6           |
| 13  | 35  | F   | Bone, humerus                | osteosarcoma                                 | 6           |
| 14  | 44  | F   | Hip                          | osteosarcoma                                 | 6           |
| 15  | 19  | M   | Bone, femur                  | osteosarcoma, osteoblastic type              | 6           |
| 16  | 44  | F   | Bone, femur                  | osteosarcoma                                 | 6           |
| 17  | 19  | M   | Bone, femur                  | osteosarcoma, osteoblastic type              | 6           |
| 18  | 16  | M   | Leg                          | osteosarcoma, chondroblastic type            | 6           |
| 19  | 18  | M   | Bone, femur                  | osteosarcoma, telangiectatic type            | 6           |
| 20  | 10  | M   | Bone, femur                  | osteosarcoma, osteoblastic type              | 6           |
| 21  | 10  | M   | Bone, femur                  | osteosarcoma, osteoblastic type              | 6           |
| 22  | 10  | M   | Bone, femur                  | osteosarcoma, osteoblastic type              | 6           |
| 23  | 11  | F   | Bone, femur                  | osteosarcoma, osteoblastic type              | 6           |
| 24  | 11  | M   | Bone, femur                  | osteosarcoma, osteoblastic type              | 6           |
| 25  | 19  | M   | Bone, femur                  | osteosarcoma                                 | 6           |
| 26  | 19  | M   | Bone, femur                  | osteosarcoma                                 | 6           |
| 27  | 10  | M   | Bone, femur                  | osteosarcoma, osteoblastic type              | 6           |
| 28  | 10  | M   | Bone, femur                  | osteosarcoma, osteoblastic type              | 6           |
| 29  | 14  | M   | Bone, femur                  | osteosarcoma                                 | 6           |
| 30  | 18  | M   | Bone, mandible               | osteosarcoma                                 | 6           |
| 31  | 13  | M   | Bone, femur                  | osteosarcoma                                 | 6           |
| 32  | 14  | M   | Bone, femur                  | osteosarcoma, osteoblastic type              | 6           |
| 33  | 9   | M   | Bone, femur                  | osteosarcoma                                 | 6           |
| 34  | 12  | F   | Bone, tibia                  | osteosarcoma, chondroblastic type            | 6           |
| 35  | 9   | F   | Bone, tibia                  | osteosarcoma, chondroblastic type            | 6           |
| 36  | 5   | M   | Bone, femur                  | osteosarcoma                                 | 6           |
| 37  | 11  | M   | Bone, fibula                 | osteosarcoma, chondroblastic type            | 6           |
| 38  | 11  | M   | Bone, fibula                 | osteosarcoma, chondroblastic type            | 6           |
| 39  | 11  | M   | Bone, tibia                  | osteosarcoma                                 | 6           |
| 40  | 11  | M   | Bone, tibia                  | osteosarcoma                                 | 6           |
| 41  | 38  | M   | Mediastinum                  | extraskelatal osteosarcoma                   | 6           |
| 42  | 34  | F   | Lung                         | metastatic osteosarcoma, chondroblastic type | 6           |
| 43  | 24  | F   | Bone, tibia and fibula       | osteosarcoma, osteoblastic type              | 6           |
| 44  | 26  | M   | Bone, calcaneus              | osteosarcoma, osteoblastic type              | 6           |
| 45  | 22  | M   | Bone, humerus                | osteosarcoma, osteoblastic type              | 6           |
| 46  | 18  | M   | Bone, femur                  | osteosarcoma, osteoblastic type              | 6           |
| 47  | 22  | M   | Bone, tibia and fibula       | osteosarcoma, osteoblastic type              | 6           |
| 48  | 20  | F   | Bone, tibia                  | osteosarcoma, osteoblastic type              | 6           |
| 49  | 22  | M   | Bone, humerus                | osteosarcoma, osteoblastic type              | 6           |
| 50  | 24  | M   | Soft tissue, popliteal fossa | synovial sarcoma                             | 6           |
| 51  | 23  | M   | Bone, humerus                | osteosarcoma                                 | 6           |
| 52  | 17  | F   | Bone, tibia                  | osteosarcoma, fibroblastic type              | 6           |
| 53  | 16  | F   | Bone, femur                  | osteosarcoma                                 | 6           |
| 54  | 20  | F   | Bone, femur                  | osteosarcoma, osteoblastic type              | 6           |
| 55  | 27  | M   | Bone, femur                  | osteosarcoma, osteoblastic type              | 6           |
| 56  | 59  | M   | Mandible                     | extraskelatal osteosarcoma                   | 6           |
| 57  | 29  | M   | Soft tissue                  | granulation tissue                           | 1           |
| 58  | 31  | F   | Bone, tibia                  | osteosarcoma, osteoblastic type              | 6           |
| 59  | 39  | M   | Bone, femur                  | osteosarcoma, osteoblastic type              | 6           |
| 60  | 61  | F   | Bone, ilium                  | radiation-induced sarcoma                    | 6           |

**ab178122 –  
Colon cancer tissue array  
paired with normal tissues in  
triplicates, 126 samples  
(1.5mm), set 1**

**Instructions for Use**

Designed for normal vs cancer IHC or ISH based protein or RNA tissue profiling in colon cancers.

This product is for research use only and is not intended for diagnostic use.

**Product Overview:**

ab178122 is a colon paired cancer/normal tissue array, set 1, 42 cases, 126 cores, non-overlapping with ab178123, one normal paired with two tumor tissue cores from each patient.

|            |                     |
|------------|---------------------|
| Case:      | 42                  |
| Core:      | 126                 |
| Format:    | 9 rows x 14 columns |
| Size:      | 1.5mm               |
| Thickness: | 4µm                 |

All the tissues were fixed in 10% neutral buffered formalin for 24 hours and processed using identical SOPs. Sections were picked onto Superfrost Plus or Startfrost Adhesive slides. There may be >5% tissue core losses for a slide. But retention rate should be >90%.

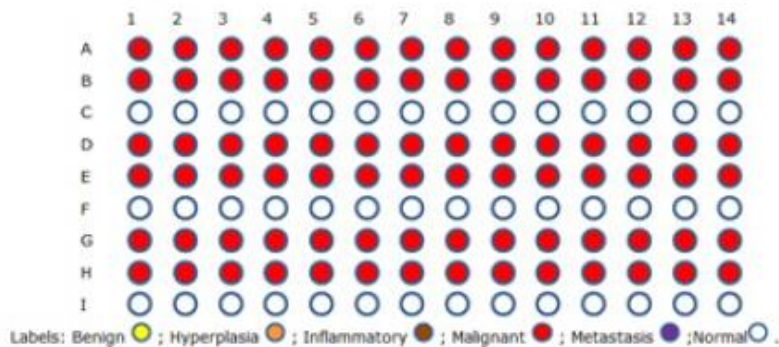

**Notes for use:**

Bake the slides at 60°C for 30 minutes before use. If antigen retrieval is needed, it is always a good idea to start with a protocol with weak to mild strength.

For hints and tips on Immunohistochemistry as well as other techniques please visit [www.abcam.com/protocols](http://www.abcam.com/protocols).

Keep up to date on Abcam events and conferences on Facebook & Twitter.
